# Supplementary material for: Extending NMR Quantum Computation Systems by Employing Compounds with Several Heavy Metals as Qubits
Source: MDPI journal article supplement (doi:10.3390/magnetochemistry8050047), 2022-04-21
Supplement: s1 [file s1]

## Supplementary Material

### Extending NMR quantum computation systems by employing compounds with several heavy metals as qubits

Jéssica Boreli dos Reis Lino,<sup>a‡</sup> Mateus Aquino Gonçalves,<sup>a</sup> Stephan P. A. Sauer,<sup>b#</sup>  
Teodorico Castro Ramalho<sup>a,c\*</sup>

<sup>a</sup> Department of Chemistry, Federal University of Lavras, 37200-000 Lavras, MG, Brazil.

<sup>b</sup> Department of Chemistry, University of Copenhagen, Universitetsparken 5, DK-2100 Copenhagen, Denmark.

<sup>c</sup> Center for Basic and Applied Research, Faculty of Informatics and Management, University Hradec Kralove, 50003 Hradec Kralove.

<sup>‡</sup> jessicaboreli@outlook.com

<sup>#</sup> sauer.kiku@gmail.com

<sup>\*</sup>teodorico.ramalho@gmail.com

#### Table of contents

|                |                                                                                                                                                                 |
|----------------|-----------------------------------------------------------------------------------------------------------------------------------------------------------------|
| Pages S2:      | <b>Table S1:</b> Coordinates of calculated geometries for the studied complexes.                                                                                |
| Page S3:       | <b>Table S2:</b> Vibrational frequencies for the studied complexes, $cm^{-1}$ .                                                                                 |
| Pages S4-S11:  | <b>Tables S3-S6:</b> Larmor frequencies, coupling constants and the differences in Larmor frequencies between the two coupled nuclei for the studied complexes. |
| Pages S12-S19: | <b>Tables S7-S10:</b> ratio analysis, $\Delta\omega_0/J \geq 10$ for the studied complexes.                                                                     |



**Table S1:** Coordinates of calculated geometries for the studied complexes.

| Complex 1 |           |           |           | Complex 2 |           |           |           | Complex 3 |           |           |           | Complex 4 |           |           |           |
|-----------|-----------|-----------|-----------|-----------|-----------|-----------|-----------|-----------|-----------|-----------|-----------|-----------|-----------|-----------|-----------|
| Hg        | -0.731604 | 1.473029  | 1.107749  | Hg        | -0.480384 | 1.282650  | 0.778948  | Cd        | -0.604672 | 1.202860  | 0.749525  | Cd        | -0.491199 | 1.019556  | 1.148343  |
| Te        | 1.594544  | 2.715626  | 0.152548  | Se        | 1.829430  | 1.979525  | -0.366544 | Te        | 1.829632  | 2.295218  | -0.358331 | Se        | 1.490394  | 2.643129  | 0.190500  |
| Te        | -3.109501 | 1.901512  | 2.369876  | Se        | -2.551830 | 2.346838  | 1.866491  | Te        | -2.849904 | 2.466373  | 1.881376  | Se        | -2.982897 | 2.002018  | 1.157723  |
| P         | -3.191378 | -0.479735 | 2.808217  | P         | -3.062306 | 0.474964  | 2.854749  | P         | -3.271545 | 0.364652  | 2.982946  | P         | -3.625876 | 0.380991  | 2.428089  |
| Si        | 3.544174  | 1.091190  | 2.409617  | Si        | 3.640481  | 0.747870  | 1.996486  | Si        | 3.801233  | 0.752547  | 1.926946  | Si        | 3.730322  | 0.700936  | 1.540854  |
| F         | -0.913622 | 0.252289  | -0.695063 | F         | -0.859093 | -0.216964 | -0.738980 | F         | -1.021240 | 0.001542  | -0.910776 | F         | -0.095816 | -0.325802 | -0.399933 |
| F         | 0.288971  | -0.090711 | 2.339916  | F         | 0.362933  | -0.055697 | 2.342673  | F         | 0.155903  | -0.029351 | 2.307520  | F         | -0.246224 | 0.339617  | 3.115564  |
| N         | -3.172760 | -1.525030 | 1.548766  | N         | -3.297543 | -0.861230 | 1.945702  | N         | -3.431396 | -0.993944 | 2.076837  | N         | -3.315720 | -1.150350 | 1.937617  |
| C         | 2.748493  | 0.989033  | 0.692074  | C         | 2.770640  | 0.421301  | 0.334466  | C         | 2.868944  | 0.527478  | 0.293489  | C         | 2.776940  | 1.191268  | -0.032142 |
| C         | 3.799979  | -0.670722 | 2.978621  | C         | 5.379509  | 1.340826  | 1.606905  | C         | 5.419627  | 1.625263  | 1.554369  | C         | 5.391985  | 0.067529  | 0.942007  |
| C         | 2.441637  | 2.001451  | 3.613256  | C         | 3.670491  | -0.882827 | 2.905665  | C         | 4.125316  | -0.966356 | 2.594825  | C         | 2.816308  | -0.640868 | 2.455902  |
| C         | 5.184665  | 1.988264  | 2.233298  | C         | 2.742112  | 2.042991  | 3.000320  | C         | 2.777726  | 1.734014  | 3.140888  | C         | 3.979153  | 2.204406  | 2.632096  |
| C         | 1.192975  | 2.120018  | -1.868760 | C         | 1.365597  | 1.290663  | -2.130161 | C         | 1.284812  | 1.562096  | -2.302758 | C         | 0.738432  | 2.567579  | -1.609037 |
| C         | -1.952489 | -1.015560 | 3.977140  | C         | -1.937165 | 0.041208  | 4.169075  | C         | -2.103999 | -0.004520 | 4.287798  | C         | -3.069931 | 0.514728  | 4.122052  |
| C         | -4.117967 | -1.346634 | 0.432873  | C         | -4.208030 | -0.820018 | 0.787892  | C         | -4.312809 | -0.988038 | 0.896550  | C         | -3.602743 | -1.570633 | 0.557878  |
| C         | -3.322262 | -1.770914 | -0.792640 | C         | -3.553960 | -1.751783 | -0.221222 | C         | -3.543073 | -1.796015 | -0.136448 | C         | -2.447737 | -2.499188 | 0.219825  |
| C         | -2.371979 | -2.821999 | -0.235890 | C         | -2.864471 | -2.781355 | 0.663368  | C         | -2.799204 | -2.812704 | 0.718575  | C         | -2.156567 | -3.169372 | 1.556442  |
| C         | -1.946679 | -2.228896 | 1.097641  | C         | -2.291690 | -1.941288 | 1.794688  | C         | -2.356262 | -2.005643 | 1.931401  | C         | -2.321369 | -2.045297 | 2.574132  |
| H         | 3.504252  | 0.883893  | -0.089443 | H         | 3.503377  | 0.149437  | -0.429267 | H         | 3.562851  | 0.280612  | -0.513160 | H         | 3.478016  | 1.537956  | -0.795320 |
| H         | 2.047298  | 0.154447  | 0.658230  | H         | 2.035125  | -0.375885 | 0.442289  | H         | 2.119711  | -0.258876 | 0.385278  | H         | 2.202650  | 0.345474  | -0.421185 |
| H         | 4.425830  | -1.235959 | 2.283158  | H         | 5.362800  | 2.261951  | 1.017475  | H         | 5.253322  | 2.607254  | 1.103017  | H         | 5.957024  | 0.847460  | 0.424705  |
| H         | 2.825128  | -1.160631 | 3.045326  | H         | 5.940931  | 0.591220  | 1.042464  | H         | 6.037934  | 1.040135  | 0.868147  | H         | 5.268619  | -0.772551 | 0.253244  |
| H         | 4.275271  | -0.704747 | 3.962773  | H         | 5.934533  | 1.547789  | 2.526055  | H         | 5.996273  | 1.777629  | 2.470950  | H         | 5.997052  | -0.280881 | 1.783569  |
| H         | 1.474831  | 1.492866  | 3.654748  | H         | 4.174110  | -1.662130 | 2.327636  | H         | 4.688971  | -1.575484 | 1.883381  | H         | 2.638046  | -1.498963 | 1.801936  |
| H         | 2.886901  | 1.995711  | 4.612295  | H         | 4.184393  | -0.792055 | 3.866460  | H         | 4.697257  | -0.925256 | 3.525887  | H         | 3.415285  | -0.984969 | 3.304607  |
| H         | 2.284149  | 3.047827  | 3.334854  | H         | 2.638016  | -1.192803 | 3.086772  | H         | 3.176054  | -1.467576 | 2.799027  | H         | 1.848008  | -0.303652 | 2.841655  |
| H         | 5.686617  | 2.072376  | 3.201114  | H         | 3.262855  | 2.205638  | 3.948494  | H         | 3.262534  | 1.750585  | 4.121294  | H         | 4.606066  | 1.945025  | 3.489803  |
| H         | 5.045732  | 3.001524  | 1.845589  | H         | 1.730494  | 1.689054  | 3.211970  | H         | 1.796028  | 1.260266  | 3.239753  | H         | 3.028370  | 2.574528  | 3.025125  |
| H         | 5.859329  | 1.459423  | 1.554537  | H         | 2.686915  | 3.008031  | 2.488817  | H         | 2.640863  | 2.773715  | 2.829094  | H         | 4.467461  | 3.022530  | 2.096391  |
| H         | 2.145736  | 1.903625  | -2.347565 | H         | 2.289003  | 0.998455  | -2.627178 | H         | 2.190774  | 1.237399  | -2.809970 | H         | 1.511115  | 2.858001  | -2.318553 |
| H         | 0.704713  | 2.959214  | -2.361477 | H         | 0.892702  | 2.109482  | -2.671252 | H         | 0.834633  | 2.394900  | -2.841130 | H         | -0.089246 | 3.274680  | -1.650085 |
| H         | 0.529763  | 1.254905  | -1.808581 | H         | 0.667699  | 0.463342  | -1.993702 | H         | 0.561605  | 0.758858  | -2.155208 | H         | 0.390729  | 1.549135  | -1.779976 |
| H         | -0.969615 | -0.814255 | 3.512072  | H         | -0.951023 | -0.124217 | 3.700234  | H         | -1.118753 | -0.121094 | 3.811656  | H         | -1.972937 | 0.457142  | 4.107535  |
| H         | -2.059423 | -0.413902 | 4.880170  | H         | -1.880079 | 0.885819  | 4.856154  | H         | -2.084034 | 0.846677  | 4.968632  | H         | -3.384252 | 1.488484  | 4.498429  |
| H         | -2.089772 | -2.074334 | 4.204434  | H         | -2.295219 | -0.849421 | 4.688525  | H         | -2.406511 | -0.909980 | 4.817031  | H         | -3.505553 | -0.282450 | 4.727140  |
| H         | -4.455813 | -0.647418 | 3.406799  | H         | -4.313615 | 0.768016  | 3.430195  | H         | -4.526377 | 0.554401  | 3.594822  | H         | -5.028813 | 0.509599  | 2.454208  |
| H         | -4.995932 | -1.982893 | 0.594638  | H         | -5.200332 | -1.173991 | 1.091301  | H         | -5.271418 | -1.455144 | 1.151429  | H         | -4.568147 | -2.089911 | 0.521376  |
| H         | -4.453329 | -0.306475 | 0.371787  | H         | -4.306277 | 0.201226  | 0.409397  | H         | -4.506155 | 0.037662  | 0.568173  | H         | -3.652116 | -0.702469 | -0.104219 |
| H         | -3.967565 | -2.145113 | -1.588928 | H         | -4.282199 | -2.187194 | -0.907197 | H         | -4.203972 | -2.254026 | -0.874233 | H         | -2.710000 | -3.208895 | -0.566356 |
| H         | -2.732857 | -0.925891 | -1.157481 | H         | -2.794029 | -1.203554 | -0.784684 | H         | -2.820909 | -1.153713 | -0.650627 | H         | -1.586327 | -1.909007 | -0.110715 |
| H         | -1.509451 | -2.989773 | -0.880987 | H         | -2.077005 | -3.324409 | 0.140520  | H         | -1.944769 | -3.250776 | 0.202178  | H         | -1.157407 | -3.603258 | 1.605326  |
| H         | -2.886979 | -3.776381 | -0.086058 | H         | -3.585400 | -3.506848 | 1.053673  | H         | -3.465517 | -3.624561 | 1.026704  | H         | -2.881866 | -3.964932 | 1.752452  |
| H         | -1.117098 | -1.532065 | 0.963536  | H         | -1.313350 | -1.534498 | 1.530227  | H         | -1.384091 | -1.531928 | 1.772617  | H         | -1.382086 | -1.515284 | 2.753594  |
| H         | -1.664314 | -2.988087 | 1.829620  | H         | -2.200545 | -2.500024 | 2.728496  | H         | -2.296793 | -2.617052 | 2.834931  | H         | -2.698545 | -2.412941 | 3.531804  |



**Table S2:** Vibrational frequencies for the studied complexes,  $cm^{-1}$ .

|    | Complex 1 | Complex 2 | Complex 3 | Complex 4 |     |         |         |         |         |  |
|----|-----------|-----------|-----------|-----------|-----|---------|---------|---------|---------|--|
| 0  | 0         | 0         | 0         | 0         | 66  | 908.22  | 939.26  | 905.82  | 940.93  |  |
| 1  | 0         | 0         | 0         | 0         | 67  | 938.59  | 942.68  | 939.80  | 942.84  |  |
| 2  | 0         | 0         | 0         | 0         | 68  | 943.05  | 962.91  | 942.49  | 946.81  |  |
| 3  | 0         | 0         | 0         | 0         | 69  | 964.52  | 974.81  | 965.50  | 976.26  |  |
| 4  | 0         | 0         | 0         | 0         | 70  | 991.21  | 992.66  | 992.58  | 993.80  |  |
| 5  | 0         | 0         | 0         | 0         | 71  | 1012.80 | 1014.78 | 1014.93 | 1019.96 |  |
| 6  | 2.17      | 6.59      | 5.76      | 9.85      | 72  | 1036.33 | 1051.71 | 1027.04 | 1051.80 |  |
| 7  | 14.18     | 20.34     | 11.69     | 16.13     | 73  | 1050.79 | 1074.46 | 1051.05 | 1083.88 |  |
| 8  | 25.64     | 25.59     | 21.75     | 24.38     | 74  | 1105.04 | 1122.69 | 1090.55 | 1120.81 |  |
| 9  | 30.29     | 33.42     | 27.06     | 28.90     | 75  | 1119.81 | 1140.77 | 1116.45 | 1148.74 |  |
| 10 | 38.17     | 42.31     | 36.30     | 36.41     | 76  | 1146.04 | 1148.30 | 1146.86 | 1150.93 |  |
| 11 | 47.29     | 51.60     | 48.70     | 54.74     | 77  | 1154.91 | 1156.80 | 1153.07 | 1157.83 |  |
| 12 | 52.21     | 55.83     | 61.60     | 65.80     | 78  | 1205.31 | 1205.68 | 1204.13 | 1203.99 |  |
| 13 | 66.42     | 67.89     | 62.61     | 69.77     | 79  | 1225.17 | 1228.08 | 1227.81 | 1232.89 |  |
| 14 | 72.63     | 74.10     | 71.98     | 79.72     | 80  | 1263.04 | 1263.01 | 1268.41 | 1272.06 |  |
| 15 | 81.02     | 85.77     | 76.85     | 86.06     | 81  | 1265.14 | 1266.93 | 1269.77 | 1278.46 |  |
| 16 | 88.39     | 91.71     | 89.13     | 89.78     | 82  | 1267.71 | 1276.54 | 1273.04 | 1278.68 |  |
| 17 | 100.75    | 112.52    | 92.04     | 102.24    | 83  | 1277.10 | 1280.81 | 1279.77 | 1286.56 |  |
| 18 | 108.11    | 113.56    | 113.23    | 109.63    | 84  | 1279.40 | 1286.44 | 1280.80 | 1298.99 |  |
| 19 | 112.99    | 124.16    | 116.66    | 126.24    | 85  | 1287.77 | 1309.09 | 1285.67 | 1304.44 |  |
| 20 | 124.60    | 132.57    | 127.80    | 135.72    | 86  | 1325.90 | 1326.46 | 1325.07 | 1322.44 |  |
| 21 | 133.27    | 152.60    | 136.47    | 145.02    | 87  | 1333.65 | 1331.89 | 1328.71 | 1328.16 |  |
| 22 | 143.34    | 161.51    | 144.50    | 150.93    | 88  | 1366.79 | 1367.01 | 1366.51 | 1365.24 |  |
| 23 | 147.85    | 163.42    | 147.28    | 156.16    | 89  | 1377.10 | 1381.65 | 1383.75 | 1384.48 |  |
| 24 | 160.89    | 168.10    | 156.51    | 159.62    | 90  | 1386.34 | 1394.86 | 1395.36 | 1397.31 |  |
| 25 | 162.49    | 171.57    | 159.95    | 166.56    | 91  | 1394.14 | 1405.95 | 1396.90 | 1419.76 |  |
| 26 | 163.72    | 183.14    | 164.18    | 169.49    | 92  | 1431.92 | 1432.51 | 1433.31 | 1433.62 |  |
| 27 | 181.47    | 184.28    | 170.69    | 174.54    | 93  | 1439.55 | 1439.03 | 1441.06 | 1440.20 |  |
| 28 | 182.71    | 194.32    | 174.76    | 182.68    | 94  | 1439.83 | 1444.52 | 1443.08 | 1444.51 |  |
| 29 | 189.01    | 196.83    | 179.28    | 191.47    | 95  | 1447.79 | 1448.38 | 1446.53 | 1448.78 |  |
| 30 | 194.55    | 204.26    | 189.18    | 206.84    | 96  | 1450.78 | 1451.17 | 1450.81 | 1452.73 |  |
| 31 | 196.12    | 204.75    | 197.16    | 211.91    | 97  | 1453.32 | 1452.93 | 1454.80 | 1455.81 |  |
| 32 | 210.42    | 208.80    | 210.71    | 219.63    | 98  | 1459.93 | 1461.39 | 1458.39 | 1458.71 |  |
| 33 | 218.23    | 222.88    | 215.15    | 222.87    | 99  | 1470.58 | 1470.68 | 1471.37 | 1470.12 |  |
| 34 | 222.45    | 227.20    | 220.78    | 234.21    | 100 | 1472.69 | 1472.83 | 1472.47 | 1473.21 |  |
| 35 | 231.30    | 237.77    | 231.32    | 245.57    | 101 | 1475.42 | 1477.68 | 1473.06 | 1479.28 |  |
| 36 | 257.21    | 258.69    | 246.60    | 247.64    | 102 | 1477.67 | 1480.02 | 1484.00 | 1486.36 |  |
| 37 | 264.59    | 274.08    | 264.11    | 272.77    | 103 | 1486.06 | 1488.84 | 1497.58 | 1501.81 |  |
| 38 | 277.22    | 290.25    | 281.46    | 281.62    | 104 | 1503.55 | 1507.68 | 1510.06 | 1513.85 |  |
| 39 | 295.95    | 298.89    | 286.14    | 299.86    | 105 | 1515.92 | 1521.57 | 1533.76 | 1540.26 |  |
| 40 | 308.29    | 322.40    | 345.55    | 353.22    | 106 | 2442.92 | 2449.48 | 2441.85 | 2439.57 |  |
| 41 | 347.54    | 355.71    | 365.59    | 407.71    | 107 | 2896.57 | 2918.71 | 2973.08 | 2995.05 |  |
| 42 | 354.80    | 372.60    | 386.63    | 416.76    | 108 | 3024.27 | 3025.32 | 3023.80 | 3021.00 |  |
| 43 | 364.81    | 405.58    | 421.64    | 426.70    | 109 | 3034.46 | 3038.97 | 3029.17 | 3025.20 |  |
| 44 | 489.09    | 504.10    | 491.63    | 508.32    | 110 | 3040.70 | 3040.83 | 3041.74 | 3042.57 |  |
| 45 | 526.09    | 563.53    | 526.80    | 559.18    | 111 | 3042.47 | 3042.01 | 3044.28 | 3043.43 |  |
| 46 | 536.69    | 572.41    | 536.48    | 581.02    | 112 | 3043.14 | 3048.56 | 3048.91 | 3047.46 |  |
| 47 | 570.92    | 599.18    | 577.57    | 600.79    | 113 | 3051.28 | 3051.43 | 3051.94 | 3051.19 |  |
| 48 | 612.48    | 623.52    | 612.29    | 625.83    | 114 | 3067.44 | 3066.26 | 3056.16 | 3053.96 |  |
| 49 | 641.21    | 660.04    | 641.02    | 675.40    | 115 | 3070.49 | 3067.50 | 3058.07 | 3058.25 |  |
| 50 | 680.79    | 681.77    | 682.66    | 682.83    | 116 | 3075.98 | 3073.80 | 3078.86 | 3061.45 |  |
| 51 | 698.72    | 698.67    | 698.66    | 699.26    | 117 | 3076.12 | 3086.05 | 3078.88 | 3093.66 |  |
| 52 | 700.89    | 702.87    | 703.73    | 709.57    | 118 | 3106.49 | 3110.03 | 3105.30 | 3099.72 |  |
| 53 | 714.00    | 724.22    | 711.94    | 731.41    | 119 | 3114.48 | 3118.08 | 3114.94 | 3107.62 |  |
| 54 | 738.60    | 743.54    | 737.47    | 743.29    | 120 | 3121.23 | 3119.01 | 3115.68 | 3120.85 |  |
| 55 | 752.19    | 757.33    | 754.99    | 763.06    | 121 | 3123.39 | 3122.24 | 3121.63 | 3121.41 |  |
| 56 | 769.77    | 773.00    | 770.00    | 766.12    | 122 | 3124.18 | 3123.14 | 3122.96 | 3123.38 |  |
| 57 | 787.18    | 793.68    | 788.65    | 803.96    | 123 | 3125.68 | 3125.58 | 3123.97 | 3123.90 |  |
| 58 | 800.28    | 811.84    | 798.52    | 810.09    | 124 | 3131.43 | 3130.20 | 3124.69 | 3125.06 |  |
| 59 | 857.13    | 862.42    | 855.83    | 865.16    | 125 | 3131.80 | 3135.54 | 3125.73 | 3125.77 |  |
| 60 | 862.13    | 868.36    | 861.53    | 868.18    | 126 | 3134.73 | 3137.54 | 3133.40 | 3126.74 |  |
| 61 | 868.18    | 871.85    | 870.59    | 871.16    | 127 | 3139.36 | 3138.22 | 3134.71 | 3128.34 |  |
| 62 | 870.24    | 873.26    | 871.82    | 872.06    | 128 | 3157.45 | 3154.33 | 3157.05 | 3131.46 |  |
| 63 | 879.02    | 880.24    | 877.58    | 880.37    | 129 | 3163.92 | 3165.24 | 3164.99 | 3164.26 |  |
| 64 | 879.85    | 898.28    | 879.10    | 898.93    | 130 | 3166.27 | 3165.31 | 3169.39 | 3173.85 |  |
| 65 | 897.51    | 937.68    | 898.72    | 934.86    | 131 | 3185.44 | 3177.28 | 3185.06 | 3176.84 |  |



**Table S3:** For Complex 1: on the diagonal are the Larmor frequencies for the nuclei, on the lower triangle of the matrix are the coupling constants between the two nuclei, on the upper triangle are the differences in Larmor frequencies between the two coupled nuclei.

|     | Hg1      | Te2      | Te3      | P4        | Si5       | F6        | F7        | C9        | C10       | C11       | C12       | C13       | C14       | C15       | C16       | C17       | C18       | H19       | H20       | H21       | H22       | H23       |
|-----|----------|----------|----------|-----------|-----------|-----------|-----------|-----------|-----------|-----------|-----------|-----------|-----------|-----------|-----------|-----------|-----------|-----------|-----------|-----------|-----------|-----------|
| Hg1 | -191843  | 96802165 | 96686569 | 158654340 | 13737898  | 535132459 | 535167977 | 50763004  | 50762543  | 50762732  | 50762608  | 50761553  | 50766341  | 50772179  | 50767781  | 50768191  | 50771828  | 576615020 | 576617014 | 576614025 | 576614714 | 576613958 |
| Te2 | 3302.70  | 10295    | 115597   | 61852174  | 83064267  | 438330293 | 438365811 | 46039162  | 46039622  | 46039433  | 46039558  | 46040612  | 46035825  | 46029987  | 46034385  | 46033974  | 46030337  | 479812855 | 479814849 | 479811860 | 479812548 | 479811792 |
| Te3 | 5102.88  | 19.03    | 125887   | 61967771  | 82948671  | 438445890 | 438481408 | 45923565  | 45924025  | 45923836  | 45923961  | 45925015  | 45920228  | 45914390  | 45918788  | 45918378  | 45914741  | 479928451 | 479930446 | 479927456 | 479928145 | 479927389 |
| P4  | -166.30  | 1.75     | 1411.66  | -5296     | 144916442 | 376478119 | 376513637 | 107891336 | 107891796 | 107891607 | 107891732 | 107892786 | 107887999 | 107882161 | 107886559 | 107886149 | 107882512 | 417960680 | 417962675 | 417959685 | 417960374 | 417959618 |
| Si5 | 0.13     | 38.67    |          |           | -614      | 521394561 | 521430079 | 37025106  | 37024645  | 37024835  | 37024710  | 37023655  | 37028443  | 37034281  | 37029883  | 37030293  | 37033930  | 562877122 | 562879117 | 562876127 | 562876816 | 562876060 |
| F6  | -2621.28 | 49.16    | 83.24    |           | 0.15      | -133242   | 35518     | 484369455 | 484369915 | 484369726 | 484369851 | 484370905 | 484366118 | 484360280 | 484364678 | 484364268 | 484360631 | 41482561  | 41484556  | 41481566  | 41482255  | 41481499  |
| F7  | -2405.23 | 34.35    | 100.36   |           | 0.01      | 1.87      | -97846    | 484404973 | 484405433 | 484405244 | 484405369 | 484406423 | 484401636 | 484395798 | 484400196 | 484399786 | 484396149 | 41447043  | 41449038  | 41446048  | 41446737  | 41445981  |
| C9  | -15.82   | 195.08   |          |           | -34.38    | -0.11     | 5.16      | 280       | 460       | 271       | 396       | 1450      | 3337      | 9175      | 4777      | 5187      | 8824      | 525852016 | 525854011 | 525851021 | 525851710 | 525850954 |
| C10 |          | -7.57    |          |           | -41.49    | -0.03     | 1.01      | 4.90      | -179      | 189       | 64        | 990       | 3797      | 9635      | 5237      | 5648      | 9285      | 525852477 | 525854471 | 525851482 | 525852170 | 525851414 |
| C11 |          | -23.39   |          |           | -41.75    | -0.16     | 5.66      | 2.68      | 3.52      | 10        | 125       | 1179      | 3608      | 9446      | 5048      | 5458      | 9096      | 525852287 | 525854282 | 525851293 | 525851981 | 525851225 |
| C12 |          | 1.73     |          |           | -37.53    | -0.05     | 0.42      | 2.68      | 3.38      | 3.37      | -114      | 1054      | 3733      | 9571      | 5173      | 5583      | 9220      | 525852412 | 525854407 | 525851417 | 525852106 | 525851350 |
| C13 | -24.25   | 164.32   |          |           | -2.40     | 15.39     | -0.14     | 3.90      | 0.10      | -0.08     | -0.03     | -1165     | 4787      | 10625     | 6227      | 6638      | 10275     | 525853467 | 525855461 | 525852472 | 525853160 | 525852404 |
| C14 | -3.78    |          | 33.80    | 20.86     |           | 0.08      | 31.41     | -0.20     | 0.01      | 0.01      | 0.00      | 0.0       | 3606      | 5838      | 1440      | 1850      | 5487      | 525848679 | 525850674 | 525847684 | 525848373 | 525847617 |
| C15 |          |          | 0.11     | 5.81      |           | -0.69     | -0.08     | 0.09      | 0.00      | -0.01     | -0.01     | 0.0       | 0.28      | 9424      | 4398      | 3988      | 351       | 525842841 | 525844836 | 525841847 | 525842535 | 525841779 |
| C16 |          |          | -0.96    | 5.32      |           | 11.88     | -0.03     | -0.01     | 0.00      | -0.01     | -0.01     | 0.0       | 0.23      | 26.44     | 5041      | 410       | 4047      | 525847239 | 525849234 | 525846244 | 525846933 | 525846177 |
| C17 |          |          | 0.95     |           |           | -1.08     | 0.45      | 0.00      | 0.00      | -0.01     | -0.01     | 0.0       | -0.03     | 0.02      | 23.53     | 5450      | 3637      | 525846829 | 525848823 | 525845834 | 525846523 | 525845767 |
| C18 |          |          | -3.18    | 2.84      |           | 3.57      | 3.47      | 0.01      | 0.01      | 0.01      | -0.01     | 0.02      | 0.48      | 3.66      | 0.08      | 26.76     | 9075      | 525843192 | 525845186 | 525842197 | 525842886 | 525842130 |
| H19 |          | -15.77   |          |           | 3.22      | 1.24      | 2.18      | 123.68    | -0.25     | 3.23      | 1.37      | 2.34      | 0.03      | -0.03     | -0.01     | 0.01      | 0.01      | 969       | 1994      | 995       | 306       | 1062      |
| H20 |          | 0.95     |          |           | 4.60      | 1.83      | 2.38      | 135.65    | 1.65      | -0.27     | 4.10      | 1.00      | 0.06      | -0.01     | 0.02      | 0.04      | 0.09      | -7.71     | 2956      | 2989.26   | 2301      | 3057      |
| H21 |          |          |          |           | 4.56      |           |           | 0.19      | 112.77    | 5.29      | 0.08      | -0.06     | 0.03      | -0.01     | 0.00      | 0.01      | 0.02      | 0.31      | 0.36      | -23       | 688       | 67        |
| H22 |          |          |          |           | 6.74      |           |           | 0.23      | 117.10    | 0.20      | 5.37      | -0.07     | 0.08      | -0.01     | 0.00      | 0.02      | 0.04      | 0.30      | 0.58      | -11.59    | 663       | 756       |
| H23 |          |          |          |           | 3.68      |           |           | 8.07      | 112.22    | 0.10      | -0.08     | 0.15      | 0.04      | -0.02     | -0.01     | 0.00      | 0.01      | -0.22     | 0.62      | -11.82    | -11.50    | -90       |
| H24 |          |          |          |           | 6.92      |           |           | 0.35      | 0.13      | 119.40    | 5.80      | -0.21     | 0.12      | -0.05     | -0.05     | -0.02     | 0.01      | -0.17     | 0.49      | -0.15     | 0.43      | 0.20      |
| H25 |          |          |          |           | 4.27      |           |           | 5.76      | 0.27      | 111.88    | -0.09     | -0.19     | 0.04      | -0.04     | -0.03     | -0.02     | -0.01     | 1.39      | -0.17     | -0.15     | 0.09      | 0.20      |
| H26 |          |          |          |           | 3.74      |           |           | 0.13      | 5.32      | 110.67    | 0.19      | 0.05      | 0.03      | -0.07     | -0.06     | -0.04     | -0.04     | -0.30     | 0.23      | 2.41      | -0.12     | -0.15     |
| H27 |          |          |          |           | 3.93      |           |           | 6.77      | -0.09     | 0.12      | 112.02    | -0.02     | 0.00      | -0.03     | -0.03     | -0.02     | -0.02     | 0.35      | 1.87      | 0.04      | -0.27     | 0.13      |
| H28 |          |          |          |           | 4.59      |           |           | 0.25      | 5.20      | 0.07      | 111.68    | -0.12     | -0.02     | -0.04     | -0.04     | -0.03     | -0.03     | 0.25      | -0.04     | -0.29     | 2.14      | -0.31     |
| H29 |          |          |          |           | 4.64      |           |           | 0.22      | 0.22      | 5.04      | 112.20    | -0.04     | -0.01     | -0.03     | -0.02     | -0.02     | -0.02     | 0.39      | -0.01     | 0.12      | -0.18     | 0.04      |
| H30 |          | -16.98   |          |           | 0.32      | 0.53      | 1.15      | 1.44      | 0.02      | -0.05     | -0.02     | 132.24    | -0.07     | -0.02     | 0.01      | 0.00      | -0.01     | 0.47      | 0.10      | 0.01      | -0.08     | -0.09     |
| H31 |          | -90.20   |          |           | -0.86     | -0.25     | -0.72     | 3.43      | 0.36      | -0.19     | -0.06     | 129.49    | -0.09     | -0.01     | 0.01      | 0.00      | -0.03     | -0.46     | -0.79     | -0.18     | -0.27     | 0.09      |
| H32 |          | 0.87     |          |           | 0.38      | -6.33     | 0.81      | 0.60      | -0.04     | -0.15     | -0.04     | 151.11    | -0.08     | 0.02      | 0.06      | 0.04      | 0.03      | 0.10      | 0.71      | 0.00      | -0.04     | -0.14     |
| H33 |          |          | 3.54     | -18.88    |           | -0.11     | -27.47    | 0.03      | 0.07      | 0.10      | -0.02     | -0.10     | 134.29    | -0.22     | -0.01     | 0.11      | 0.23      | 0.00      | 0.42      | 0.17      | 0.37      | 0.20      |
| H34 |          |          | -1.42    | 0.11      |           | -0.38     | -0.97     | -0.01     | 0.03      | 0.06      | -0.02     | -0.10     | 123.44    | 0.82      | 0.20      | -0.03     | 0.51      | -0.10     | 0.05      | 0.06      | 0.18      | 0.11      |
| H35 |          |          | 20.35    | -10.83    |           | -0.14     | -0.53     | 0.01      | 0.03      | 0.03      | -0.02     | -0.06     | 121.84    | -0.18     | 0.07      | 0.05      | 0.22      | -0.05     | 0.12      | 0.07      | 0.18      | 0.09      |
| H36 |          |          | -55.07   | 422.22    |           | -0.61     | 1.30      | -0.12     | -0.04     | -0.05     | -0.06     | -0.15     | 3.07      | -0.30     | 0.05      | 0.39      | 3.19      | -0.16     | -0.19     | -0.13     | -0.13     | -0.11     |
| H37 |          |          | 2.33     | 9.24      |           | 0.91      | 0.08      | -0.03     | -0.01     | -0.03     | -0.03     | -0.01     | -0.19     | 129.93    | -1.83     | 0.08      | 0.28      | -0.10     | -0.04     | -0.04     | -0.02     | -0.05     |
| H38 |          |          | 3.28     | 22.07     |           | 0.89      | -0.27     | -0.06     | -0.03     | -0.07     | -0.05     | -0.01     | -0.27     | 128.27    | -1.82     | 6.66      | 3.27      | -0.19     | -0.16     | -0.10     | -0.10     | -0.11     |
| H39 |          |          | -0.25    | 0.40      |           | 2.50      | 0.08      | -0.01     | -0.01     | -0.04     | -0.03     | 0.04      | 0.68      | 2.22      | 121.40    | -1.23     | 7.90      | -0.03     | 0.05      | -0.02     | -0.01     | -0.04     |
| H40 |          |          | 0.19     | -0.36     |           | -0.60     | 0.02      | -0.01     | -0.01     | -0.06     | -0.04     | 0.09      | -0.06     | -3.96     | 129.67    | -3.68     | 0.73      | -0.04     | 0.11      | -0.03     | -0.02     | -0.07     |
| H41 |          |          | 1.27     | 2.08      |           | 0.55      | 0.44      | 0.04      | 0.01      | -0.02     | -0.02     | 0.04      | 0.03      | 8.36      | -1.41     | 126.03    | 2.38      | 0.09      | 0.27      | 0.05      | 0.09      | 0.01      |
| H42 |          |          | 0.04     | -0.39     |           | 1.63      | 1.55      | 0.02      | 0.01      | -0.02     | -0.02     | 0.02      | 0.00      | 0.63      | -2.72     | 116.70    | -3.51     | 0.01      | 0.13      | 0.02      | 0.06      | 0.00      |
| H43 |          |          | -1.80    | 15.60     |           | 3.11      | 3.31      | 0.09      | 0.05      | 0.00      | -0.03     | 0.02      | 0.11      | -0.05     | 0.14      | -2.86     | 141.85    | 0.11      | 0.55      | 0.14      | 0.28      | 0.10      |
| H44 |          |          | -2.28    | 0.34      |           | 3.06      | -0.06     | 0.04      | 0.03      | 0.00      | -0.02     | 0.00      | 0.32      | 4.25      | 6.03      | -1.31     | 129.44    | 0.04      | 0.26      | 0.08      | 0.17      | 0.07      |



**cont. Table S3:** For Complex 1: on the diagonal are the Larmor frequencies for the nuclei, on the lower triangle of the matrix are the coupling constants between the two nuclei, on the upper triangle are the differences in Larmor frequencies between the two coupled nuclei.

|     | H24       | H25       | H26       | H27       | H28       | H29       | H30       | H31       | H32       | H33       | H34       | H35       | H36       | H37       | H38       | H39       | H40       | H41       | H42       | H43       | H44       |
|-----|-----------|-----------|-----------|-----------|-----------|-----------|-----------|-----------|-----------|-----------|-----------|-----------|-----------|-----------|-----------|-----------|-----------|-----------|-----------|-----------|-----------|
| Hg1 | 576615251 | 576613952 | 576613913 | 576614025 | 576614232 | 576614036 | 576615020 | 576615058 | 576618312 | 576619399 | 576615211 | 576615893 | 576619497 | 576615769 | 576616412 | 576615063 | 576616692 | 576615532 | 576615186 | 576617212 | 576615975 |
| Te2 | 479813086 | 479811787 | 479811748 | 479811860 | 479812066 | 479811871 | 479812855 | 479812893 | 479816147 | 479817233 | 479813046 | 479813728 | 479817332 | 479813604 | 479814246 | 479812898 | 479814527 | 479813367 | 479813021 | 479815047 | 479813810 |
| Te3 | 479928682 | 479927383 | 479927345 | 479927456 | 479927663 | 479927468 | 479928451 | 479928489 | 479931743 | 479932830 | 479928642 | 479929324 | 479932928 | 479929201 | 479929843 | 479928495 | 479930123 | 479928963 | 479928618 | 479930644 | 479929407 |
| P4  | 417960911 | 417959612 | 417959574 | 417959685 | 417959892 | 417959697 | 417960680 | 417960718 | 417963972 | 417965059 | 417960871 | 417961553 | 417965157 | 417961430 | 417962072 | 417960724 | 417962352 | 417961192 | 417960847 | 417962873 | 417961636 |
| Si5 | 562877353 | 562876054 | 562876016 | 562876127 | 562876334 | 562876139 | 562877122 | 562877160 | 562880414 | 562881501 | 562877313 | 562877995 | 562881599 | 562877872 | 562878514 | 562877166 | 562878794 | 562877634 | 562877289 | 562879315 | 562878077 |
| F6  | 41482792  | 41481493  | 41481455  | 41481566  | 41481773  | 41481578  | 41482561  | 41482599  | 41485853  | 41486940  | 41482752  | 41483434  | 41487038  | 41483311  | 41483953  | 41482605  | 41484233  | 41483073  | 41482728  | 41484754  | 41483517  |
| F7  | 41447274  | 41445975  | 41445937  | 41446048  | 41446255  | 41446060  | 41447043  | 41447081  | 41450335  | 41451422  | 41447234  | 41447916  | 41451520  | 41447793  | 41448435  | 41447087  | 41448715  | 41447555  | 41447210  | 41449236  | 41447999  |
| C9  | 525852247 | 525850948 | 525850910 | 525851021 | 525851228 | 525851033 | 525852016 | 525852054 | 525853308 | 525856395 | 525852207 | 525852889 | 525856493 | 525852766 | 525853408 | 525852060 | 525853688 | 525852528 | 525852183 | 525854209 | 525852972 |
| C10 | 525852708 | 525851409 | 525851370 | 525851482 | 525851688 | 525851493 | 525852477 | 525852515 | 525855769 | 525856856 | 525852668 | 525853350 | 525856954 | 525853226 | 525853868 | 525852520 | 525854149 | 525852989 | 525852643 | 525854669 | 525853432 |
| C11 | 525852519 | 525851220 | 525851181 | 525851293 | 525851499 | 525851304 | 525852287 | 525852325 | 525855579 | 525856666 | 525852479 | 525853161 | 525856765 | 525853037 | 525853679 | 525852331 | 525853959 | 525852800 | 525852454 | 525854480 | 525853243 |
| C12 | 525852643 | 525851344 | 525851306 | 525851417 | 525851624 | 525851429 | 525852412 | 525852450 | 525855704 | 525856791 | 525852603 | 525853285 | 525856889 | 525853162 | 525853804 | 525852456 | 525854084 | 525852924 | 525852579 | 525854605 | 525853368 |
| C13 | 525853698 | 525852399 | 525852360 | 525852472 | 525852678 | 525852483 | 525853467 | 525853505 | 525856759 | 525857846 | 525853658 | 525854340 | 525857944 | 525854216 | 525854858 | 525853510 | 525855139 | 525853979 | 525853633 | 525855659 | 525854422 |
| C14 | 525848910 | 525847611 | 525847573 | 525847684 | 525847891 | 525847696 | 525848679 | 525848717 | 525851971 | 525853058 | 525848870 | 525849553 | 525853156 | 525849429 | 525850071 | 525848723 | 525850351 | 525849191 | 525848846 | 525850872 | 525849635 |
| C15 | 525843072 | 525841773 | 525841735 | 525841847 | 525842053 | 525841858 | 525842841 | 525842879 | 525846133 | 525847220 | 525843032 | 525843715 | 525847319 | 525843591 | 525844233 | 525842885 | 525844513 | 525843353 | 525843008 | 525845034 | 525843797 |
| C16 | 525847470 | 525846171 | 525846133 | 525846244 | 525846451 | 525846256 | 525847239 | 525847277 | 525850531 | 525851618 | 525847430 | 525848112 | 525851716 | 525847989 | 525848631 | 525847283 | 525848911 | 525847751 | 525847406 | 525849432 | 525848195 |
| C17 | 525847060 | 525845761 | 525845723 | 525845834 | 525846041 | 525845845 | 525846829 | 525846867 | 525850121 | 525851208 | 525847020 | 525847702 | 525851306 | 525847579 | 525848221 | 525846873 | 525848501 | 525847341 | 525846995 | 525849022 | 525847784 |
| C18 | 525843423 | 525842124 | 525842085 | 525842197 | 525842404 | 525842208 | 525843192 | 525843230 | 525846484 | 525847571 | 525843383 | 525844065 | 525847669 | 525843941 | 525844584 | 525843235 | 525844864 | 525843704 | 525843358 | 525845384 | 525844147 |
| H19 | 231       | 1068      | 1106      | 995       | 788       | 984       | 0.0000    | 38        | 3292      | 4379      | 191       | 873       | 4477      | 750       | 1392      | 44        | 1672      | 512       | 166       | 2193      | 955       |
| H20 | 1763      | 3062      | 3101      | 2989      | 2783      | 2978      | 1994      | 1957      | 1298      | 2384      | 1803      | 1121      | 2483      | 1245      | 603       | 1951      | 322       | 1482      | 1828      | 198       | 1039      |
| H21 | 1226      | 73        | 112       | 0         | 207       | 11        | 995       | 1033      | 4287      | 5374      | 1186      | 1868      | 5472      | 1744      | 2386      | 1038      | 2667      | 1507      | 1161      | 3187      | 1950      |
| H22 | 537       | 762       | 800       | 688       | 482       | 677       | 306       | 344       | 3598      | 4685      | 497       | 1180      | 4784      | 1056      | 1698      | 350       | 1978      | 818       | 473       | 2499      | 1262      |
| H23 | 1293      | 6         | 44        | 67        | 274       | 79        | 1062      | 1100      | 4354      | 5441      | 1253      | 1935      | 5539      | 1812      | 2454      | 1106      | 2734      | 1574      | 1229      | 3255      | 2018      |
| H24 | 1199      | 1299      | 1338      | 1226      | 1019      | 1215      | 231       | 193       | 3061      | 4148      | 40        | 642       | 4246      | 518       | 1161      | 188       | 1441      | 281       | 65        | 1961      | 724       |
| H25 | -11.48    | -95       | 39        | 73        | 280       | 84        | 1068      | 1106      | 4360      | 5447      | 1259      | 1941      | 5545      | 1817      | 2460      | 1111      | 2740      | 1580      | 1234      | 3260      | 2023      |
| H26 | -10.57    | -12.18    | -134      | 112       | 318       | 123       | 1106      | 1144      | 4399      | 5485      | 1298      | 1980      | 5584      | 1856      | 2498      | 1150      | 2778      | 1619      | 1273      | 3299      | 2062      |
| H27 | -0.08     | 0.19      | 0.17      | -23       | 207       | 11        | 995       | 1033      | 4287      | 5374      | 1186      | 1868      | 5472      | 1744      | 2386      | 1038      | 2667      | 1507      | 1161      | 3187      | 1950      |
| H28 | -0.15     | 0.13      | 0.33      | -12.01    | 183       | 195       | 788       | 826       | 4080      | 5167      | 979       | 1661      | 5265      | 1538      | 2180      | 832       | 2460      | 1300      | 955       | 2981      | 1744      |
| H29 | 2.30      | -0.30     | -0.15     | -11.70    | -11.51    | -11       | 984       | 1021      | 4276      | 5362      | 1175      | 1857      | 5461      | 1733      | 2375      | 1027      | 2656      | 1496      | 1150      | 3176      | 1939      |
| H30 | -0.39     | -0.19     | -0.51     | -0.10     | -0.06     | 0.05      | 969       | 38        | 3292      | 4379      | 191       | 873       | 4477      | 750       | 1392      | 44        | 1672      | 512       | 166       | 2193      | 955       |
| H31 | -0.54     | -0.40     | -0.62     | -0.17     | -0.28     | -0.17     | -9.09     | 1006      | 3254      | 4341      | 153       | 835       | 4439      | 712       | 1354      | 6         | 1634      | 474       | 129       | 2155      | 918       |
| H32 | -0.44     | -0.36     | -0.62     | -0.20     | -0.28     | -0.11     | -6.00     | -9.00     | 4249      | 1087      | 3101      | 2419      | 1185      | 2542      | 1900      | 3248      | 1620      | 2780      | 3126      | 1099      | 2337      |
| H33 | 0.56      | 0.24      | 0.19      | 0.00      | -0.07     | -0.03     | -0.26     | -0.40     | -0.29     | 5332      | 4188      | 3506      | 98        | 3629      | 2987      | 4335      | 2707      | 3867      | 4212      | 2186      | 3423      |
| H34 | 0.37      | 0.17      | 0.14      | -0.01     | -0.06     | -0.05     | -0.26     | -0.33     | -0.33     | -12.97    | 1159      | 682       | 4286      | 559       | 1201      | 148       | 1481      | 321       | 25        | 2002      | 764       |
| H35 | 0.21      | 0.08      | 0.02      | -0.03     | -0.08     | -0.05     | -0.17     | -0.24     | -0.17     | -10.58    | -10.45    | 1839      | 3604      | 124       | 518       | 830       | 799       | 361       | 707       | 1319      | 82        |
| H36 | -0.22     | -0.15     | -0.25     | -0.16     | -0.22     | -0.18     | -0.18     | -0.34     | -0.23     | 12.60     | 1.39      | 0.99      | 5430      | 3728      | 3086      | 4434      | 2805      | 3965      | 4311      | 2285      | 3522      |
| H37 | -0.15     | -0.11     | -0.18     | -0.10     | -0.13     | -0.09     | -0.06     | -0.05     | 0.04      | 0.35      | -0.12     | 0.13      | 0.62      | 1716      | 642       | 706       | 922       | 237       | 583       | 1443      | 206       |
| H38 | -0.32     | -0.21     | -0.32     | -0.16     | -0.21     | -0.15     | -0.08     | -0.02     | 0.08      | -0.10     | -0.36     | -0.02     | 1.03      | -7.72     | 2355      | 1348      | 280       | 880       | 1225      | 801       | 436       |
| H39 | -0.15     | -0.11     | -0.18     | -0.08     | -0.11     | -0.07     | 0.04      | 0.06      | 0.18      | 0.02      | 0.41      | 0.08      | -0.01     | 5.85      | 0.46      | 1012      | 1628      | 469       | 123       | 2149      | 912       |
| H40 | -0.28     | -0.18     | -0.31     | -0.14     | -0.18     | -0.11     | 0.10      | 0.15      | 0.40      | 0.04      | -0.16     | 0.01      | -0.05     | 11.64     | 9.26      | -10.15    | 2635      | 1160      | 1506      | 521       | 717       |
| H41 | -0.07     | -0.07     | -0.16     | -0.07     | -0.10     | -0.04     | 0.08      | 0.04      | 0.25      | 0.20      | -0.03     | 0.10      | 0.48      | -0.43     | 0.77      | 0.58      | 6.54      | 1479      | 346       | 1680      | 443       |
| H42 | -0.05     | -0.06     | -0.12     | -0.06     | -0.09     | -0.05     | 0.01      | -0.01     | 0.12      | 0.16      | -0.01     | 0.12      | 0.04      | -0.10     | -0.29     | 5.82      | 12.82     | -9.52     | 1135      | 2026      | 789       |
| H43 | 0.10      | -0.03     | -0.19     | -0.09     | -0.16     | -0.06     | -0.01     | -0.12     | 0.27      | 0.71      | 0.20      | 0.33      | -1.06     | 0.22      | -0.15     | -0.32     | 0.33      | 6.66      | 11.49     | 3153      | 1237      |
| H44 | 0.08      | 0.00      | -0.08     | -0.05     | -0.10     | -0.04     | -0.05     | -0.12     | 0.05      | 0.84      | 0.51      | 0.15      | -0.30     | -0.46     | 0.15      | 0.76      | -0.18     | 0.38      | 8.00      | -7.67     | 1921      |



**Table S4:** For Complex 2: on the diagonal are the Larmor frequencies for the nuclei, on the lower triangle of the matrix are the coupling constants between the two nuclei, on the upper triangle are the differences in Larmor frequencies between the two coupled nuclei.

|     | Hg1       | Se2       | se3       | P4        | Si5       | F6        | F7        | C9        | C10       | C11       | C12       | C13       | C14       | C15       | C16       | C17       | C18       | H19       | H20       | H21       | H22       | H23       |
|-----|-----------|-----------|-----------|-----------|-----------|-----------|-----------|-----------|-----------|-----------|-----------|-----------|-----------|-----------|-----------|-----------|-----------|-----------|-----------|-----------|-----------|-----------|
| Hg1 | 125907781 | 8435780   | 8401607   | 158651001 | 13721930  | 535104716 | 535154067 | 50750607  | 50746891  | 50746773  | 50746619  | 50749701  | 50750333  | 50755952  | 50752074  | 50752374  | 50756044  | 576599309 | 576600880 | 576598465 | 576598245 | 576598265 |
| Se2 | -835.01   | 134343561 | 34173     | 150215220 | 5286150   | 526668936 | 526718287 | 42314827  | 42311111  | 42310993  | 42310839  | 42313921  | 42314553  | 42320172  | 42316294  | 42316594  | 42320264  | 568163529 | 568165100 | 568162685 | 568162465 | 568162484 |
| Se3 | -1485.00  | 5.75      | 134309388 | 150249393 | 5320323   | 526703109 | 526752460 | 42348999  | 42345284  | 42345165  | 42345011  | 42348093  | 42348725  | 42354344  | 42350467  | 42350767  | 42354437  | 568197702 | 568199273 | 568196857 | 568196637 | 568196657 |
| P4  | -190.65   | -0.17     | -607.71   | 284558781 | 144929070 | 376453716 | 376503067 | 107900394 | 107904109 | 107904228 | 107904382 | 107901300 | 107900668 | 107895049 | 107898926 | 107898626 | 107894956 | 417948309 | 417949879 | 417947464 | 417947244 | 417947264 |
| Si5 | -0.12     | -17.68    |           |           | 139629711 | 521382786 | 521432137 | 37028676  | 37024961  | 37024843  | 37024688  | 37027770  | 37028402  | 37034022  | 37030144  | 37030444  | 37034114  | 562877379 | 562878950 | 562876534 | 562876314 | 562876334 |
| F6  | -2483.84  | -6.41     | -21.63    |           | 0.15      | 661012497 | 49351     | 484354110 | 484357825 | 484357943 | 484358098 | 484355016 | 484354384 | 484348764 | 484352642 | 484352342 | 484348672 | 41494593  | 41496164  | 41493748  | 41493528  | 41493548  |
| F7  | -2330.77  | -6.49     | -32.00    |           | -0.46     | -0.27     | 661061848 | 484403460 | 484407176 | 484407294 | 484407448 | 484404366 | 484403734 | 484398115 | 484401993 | 484401693 | 484398023 | 41445242  | 41446813  | 41444398  | 41444178  | 41444197  |
| C9  | -21.70    | -83.82    |           |           | -34.41    | -0.05     | 4.50      | 176658388 | 3716      | 3834      | 3988      | 906       | 274       | 5345      | 1467      | 1768      | 5437      | 525848702 | 525850273 | 525847858 | 525847638 | 525847658 |
| C10 |           | -0.62     |           |           | -37.33    | -0.07     | 0.30      | 4.06      | 176654672 | 118       | 272       | 2810      | 3442      | 9061      | 5183      | 5483      | 9153      | 525852418 | 525853989 | 525851574 | 525851354 | 525851373 |
| C11 |           | 3.98      |           |           | -42.01    | -0.03     | 2.58      | 5.07      | 3.31      | 176654554 | 154       | 2928      | 3560      | 9179      | 5301      | 5601      | 9271      | 525852536 | 525854107 | 525851692 | 525851472 | 525851492 |
| C12 |           | 8.12      |           |           | -41.88    | -0.16     | 5.73      | 5.07      | 3.51      | 3.22      | 176654400 | 3082      | 3714      | 9333      | 5455      | 5756      | 9425      | 525852690 | 525854261 | 525851846 | 525851626 | 525851646 |
| C13 | -28.54    | -69.38    |           |           | -3.14     | 16.53     | -0.27     | 2.22      | 0.01      | 0.15      | -0.15     | 176657482 | 632       | 6251      | 2373      | 2673      | 6343      | 525849608 | 525851179 | 525848764 | 525848544 | 525848564 |
| C14 | -6.59     |           | -10.00    | 28.34     |           | 0.01      | 27.25     | -0.65     | -0.01     | 0.01      | 0.01      | -0.03     | 176658114 | 5619      | 1741      | 2042      | 5711      | 525848976 | 525850547 | 525848132 | 525847912 | 525847932 |
| C15 |           |           | -0.01     | 5.29      |           | -0.86     | -0.07     | 0.07      | -0.01     | -0.01     | -0.01     | -0.01     | 0.30      | 176663733 | 3878      | 3578      | 92        | 525843357 | 525844928 | 525842513 | 525842293 | 525842313 |
| C16 |           |           | 0.37      | 5.33      |           | 13.78     | -0.05     | -0.01     | -0.01     | 0.00      | -0.01     | 0.05      | 0.20      | 26.40     | 176659855 | 300       | 3970      | 525847235 | 525848806 | 525846391 | 525846171 | 525846190 |
| C17 |           |           | -0.23     |           |           | -1.02     | 0.45      | -0.01     | -0.01     | 0.00      | -0.01     | -0.01     | -0.04     | 0.03      | 23.53     | 176660155 | 3670      | 525846935 | 525848506 | 525846090 | 525845870 | 525845890 |
| C18 |           |           | 0.54      | 3.03      |           | 1.25      | 4.80      | 0.00      | -0.01     | 0.01      | 0.01      | 0.00      | 0.50      | 3.76      | 0.08      | 26.82     | 176663825 | 525843265 | 525844836 | 525842421 | 525842201 | 525842220 |
| H19 |           | 5.41      |           |           | 3.47      | 1.41      | 1.78      | 122.91    | 1.76      | -0.28     | 2.47      | 3.15      | 0.01      | -0.04     | -0.02     | -0.01     | -0.01     | 702507090 | 1571      | 844       | 1064      | 1045      |
| H20 |           | 0.83      |           |           | 4.14      | 1.80      | 2.45      | 136.23    | 3.61      | 1.68      | -0.20     | 1.09      | 0.03      | -0.03     | 0.00      | 0.03      | 0.06      | -8.42     | 702508661 | 2415      | 2635      | 2616      |
| H21 |           |           |           |           | 4.74      |           |           | 0.19      | 111.88    | 5.18      | 0.07      | -0.08     | -0.02     | -0.04     | -0.04     | -0.03     | -0.03     | 0.18      | -0.04     | 702506246 | 220       | 200       |
| H22 |           |           |           |           | 4.62      |           |           | 0.25      | 112.07    | 0.23      | 5.11      | -0.03     | -0.02     | -0.03     | -0.02     | -0.02     | -0.02     | 0.31      | -0.03     | -11.54    | 702506026 | 20        |
| H23 |           |           |           |           | 3.82      |           |           | 6.76      | 111.99    | -0.12     | 0.11      | 0.04      | -0.01     | -0.03     | -0.03     | -0.02     | -0.02     | 0.48      | 1.61      | -12.01    | -11.73    | 702506045 |
| H24 |           |           |           |           | 4.57      |           |           | 0.26      | 0.07      | 112.53    | 5.28      | -0.06     | 0.02      | -0.01     | -0.01     | 0.01      | 0.02      | 0.23      | 0.33      | -0.33     | 0.10      | 0.03      |
| H25 |           |           |           |           | 3.65      |           |           | 8.06      | -0.10     | 112.21    | 0.12      | 0.20      | 0.03      | -0.02     | -0.01     | 0.00      | 0.01      | -0.28     | 0.60      | -0.34     | 0.02      | 0.11      |
| H26 |           |           |           |           | 7.12      |           |           | 0.22      | 5.38      | 118.19    | 0.21      | -0.08     | 0.07      | -0.01     | 0.00      | 0.02      | 0.04      | 0.25      | 0.51      | 2.10      | -0.19     | -0.29     |
| H27 |           |           |           |           | 4.26      |           |           | 5.01      | 0.03      | 0.17      | 111.54    | -0.22     | 0.03      | -0.04     | -0.04     | -0.02     | -0.01     | 0.88      | -0.19     | 0.08      | -0.27     | 0.18      |
| H28 |           |           |           |           | 6.86      |           |           | 0.18      | 5.83      | 0.22      | 119.15    | -0.17     | 0.11      | -0.06     | -0.06     | -0.03     | 0.00      | -0.26     | 0.32      | -0.18     | 2.28      | -0.12     |
| H29 |           |           |           |           | 4.04      |           |           | 0.12      | 0.07      | 5.30      | 111.67    | 0.05      | 0.02      | -0.07     | -0.06     | -0.04     | -0.05     | -0.28     | 0.10      | 0.27      | -0.23     | 0.13      |
| H30 |           | 7.13      |           |           | 0.30      | 0.85      | 1.61      | 1.70      | -0.01     | 0.00      | -0.01     | 131.56    | -0.08     | -0.03     | 0.00      | -0.01     | -0.03     | 0.38      | 0.17      | 0.01      | 0.07      | -0.07     |
| H31 |           | 37.71     |           |           | -1.23     | -0.22     | -0.76     | 4.76      | -0.02     | 0.39      | -0.17     | 127.68    | -0.10     | -0.03     | 0.00      | -0.02     | -0.05     | -0.33     | -0.79     | -0.18     | -0.12     | -0.09     |
| H32 |           | 1.01      |           |           | 0.43      | -5.82     | 0.75      | 0.95      | -0.03     | -0.05     | -0.11     | 150.06    | -0.10     | 0.00      | 0.04      | 0.02      | 0.00      | 0.15      | 0.75      | -0.17     | -0.06     | -0.15     |
| H33 |           |           | -1.19     | -20.40    |           | -0.32     | -23.90    | 0.00      | -0.02     | 0.06      | 0.10      | -0.12     | 133.34    | -0.22     | -0.02     | 0.10      | 0.23      | -0.08     | 0.25      | -0.08     | -0.05     | -0.01     |
| H34 |           |           | 0.62      | -2.34     |           | -0.49     | -0.83     | -0.03     | -0.02     | 0.02      | 0.05      | -0.10     | 123.40    | 0.85      | 0.20      | -0.03     | 0.54      | -0.14     | -0.05     | -0.07     | -0.06     | -0.02     |
| H35 |           |           | -4.26     | -7.32     |           | -0.18     | -0.53     | -0.01     | -0.02     | 0.03      | 0.02      | -0.07     | 121.41    | -0.18     | 0.07      | 0.06      | 0.23      | -0.10     | 0.03      | -0.08     | -0.06     | -0.04     |
| H36 |           |           | 34.54     | 448.08    |           | -0.16     | 1.96      | -0.14     | -0.06     | -0.04     | -0.05     | -0.16     | 4.42      | -0.26     | 0.08      | 0.40      | 2.90      | -0.14     | -0.25     | -0.21     | -0.18     | -0.17     |
| H37 |           |           | 0.33      | 7.23      |           | 1.11      | -0.10     | -0.04     | -0.03     | -0.01     | -0.04     | -0.02     | -0.17     | 129.48    | -1.89     | 0.13      | 0.13      | -0.12     | -0.09     | -0.12     | -0.09     | -0.10     |
| H38 |           |           | -0.48     | 18.65     |           | 0.96      | -0.41     | -0.08     | -0.05     | -0.04     | -0.07     | -0.02     | -0.27     | 129.07    | -1.80     | 6.89      | 3.50      | -0.22     | -0.23     | -0.20     | -0.15     | -0.16     |
| H39 |           |           | 0.08      | 0.44      |           | 2.31      | 0.04      | -0.01     | -0.03     | -0.01     | -0.04     | 0.02      | 0.65      | 2.22      | 121.31    | -1.23     | 7.97      | -0.05     | 0.02      | -0.10     | -0.07     | -0.08     |
| H40 |           |           | -0.11     | -0.30     |           | -1.72     | -0.04     | -0.02     | -0.04     | -0.02     | -0.07     | 0.06      | -0.06     | -4.00     | 130.16    | -3.58     | 0.76      | -0.06     | 0.07      | -0.17     | -0.11     | -0.13     |
| H41 |           |           | -0.37     | 2.30      |           | 0.57      | 0.47      | 0.03      | -0.02     | 0.01      | -0.02     | 0.02      | 0.01      | 8.36      | -1.35     | 125.78    | 2.39      | 0.04      | 0.20      | -0.09     | -0.04     | -0.07     |
| H42 |           |           | -0.08     | -0.42     |           | 2.01      | 1.81      | 0.01      | -0.02     | 0.01      | -0.02     | 0.00      | -0.01     | 0.63      | -2.82     | 116.72    | -3.50     | -0.02     | 0.08      | -0.08     | -0.05     | -0.06     |
| H43 |           |           | 2.03      | 13.00     |           | 3.02      | 2.47      | 0.05      | -0.04     | 0.05      | -0.01     | -0.03     | 0.08      | 0.00      | 0.08      | -2.63     | 141.07    | 0.03      | 0.42      | -0.15     | -0.07     | -0.09     |
| H44 |           |           | 1.76      | -0.22     |           | 1.94      | -0.17     | 0.01      | -0.02     | 0.03      | 0.00      | -0.03     | 0.38      | 3.87      | 5.79      | -1.45     | 129.09    | -0.02     | 0.16      | -0.10     | -0.05     | -0.06     |



**cont. Table S4:** For Complex 2: on the diagonal are the Larmor frequencies for the nuclei, on the lower triangle of the matrix are the coupling constants between the two nuclei, on the upper triangle are the differences in Larmor frequencies between the two coupled nuclei.

|     | H24       | H25       | H26       | H27       | H28       | H29       | H30       | H31       | H32       | H33       | H34       | H35       | H36       | H37       | H38       | H39       | H40       | H41       | H42       | H43       | H44       |
|-----|-----------|-----------|-----------|-----------|-----------|-----------|-----------|-----------|-----------|-----------|-----------|-----------|-----------|-----------|-----------|-----------|-----------|-----------|-----------|-----------|-----------|
| Hg1 | 576598220 | 576598182 | 576599093 | 576598171 | 576599371 | 576598267 | 576599394 | 576599488 | 576602241 | 576603257 | 576599357 | 576599687 | 576604109 | 576600116 | 576600817 | 576599306 | 576601072 | 576599745 | 576599438 | 576601511 | 576600277 |
| Se2 | 568162440 | 568162401 | 568163313 | 568162391 | 568163591 | 568162487 | 568163614 | 568163707 | 568166461 | 568167476 | 568163577 | 568163907 | 568168329 | 568164336 | 568165037 | 568163525 | 568165292 | 568163965 | 568163658 | 568165731 | 568164497 |
| Se3 | 568196613 | 568196574 | 568197486 | 568196564 | 568197764 | 568196660 | 568197787 | 568197880 | 568200633 | 568201649 | 568197749 | 568198080 | 568202501 | 568198509 | 568199209 | 568197698 | 568199464 | 568198138 | 568197831 | 568199903 | 568198670 |
| P4  | 417947220 | 417947181 | 417948093 | 417947171 | 417948370 | 417947267 | 417948394 | 417948487 | 417951240 | 417952256 | 417948356 | 417948687 | 417953108 | 417949116 | 417949816 | 417948305 | 417950071 | 417948745 | 417948438 | 417950510 | 417949277 |
| Si5 | 562876290 | 562876251 | 562877163 | 562876241 | 562877441 | 562876337 | 562877464 | 562877557 | 562880310 | 562881326 | 562877426 | 562877757 | 562882178 | 562878186 | 562878886 | 562877375 | 562879141 | 562877815 | 562877508 | 562879580 | 562878347 |
| F6  | 41493504  | 41493465  | 41494377  | 41493455  | 41494655  | 41493551  | 41494678  | 41494771  | 41497524  | 41498540  | 41494641  | 41494971  | 41499392  | 41495400  | 41496100  | 41494589  | 41496355  | 41495029  | 41494722  | 41496795  | 41495561  |
| F7  | 41444153  | 41444115  | 41445026  | 41444104  | 41445304  | 41444200  | 41445327  | 41445421  | 41448174  | 41449190  | 41445290  | 41445620  | 41450042  | 41446049  | 41446750  | 41445239  | 41447005  | 41445678  | 41445371  | 41447444  | 41446210  |
| C9  | 525847613 | 525847575 | 525848487 | 525847564 | 525848764 | 525847661 | 525848787 | 525848881 | 525851634 | 525852650 | 525848750 | 525849080 | 525853502 | 525849510 | 525850210 | 525848699 | 525850465 | 525849139 | 525848832 | 525850904 | 525849670 |
| C10 | 525851329 | 525851290 | 525852202 | 525851280 | 525852480 | 525851376 | 525852503 | 525852596 | 525855350 | 525856365 | 525852466 | 525852796 | 525857218 | 525853225 | 525853926 | 525852414 | 525854181 | 525852854 | 525852547 | 525854620 | 525853386 |
| C11 | 525851447 | 525851409 | 525852321 | 525851398 | 525852598 | 525851494 | 525852621 | 525852715 | 525855468 | 525856484 | 525852584 | 525852914 | 525857336 | 525853343 | 525854044 | 525852533 | 525854299 | 525852972 | 525852665 | 525854738 | 525853504 |
| C12 | 525851602 | 525851563 | 525852475 | 525851552 | 525852752 | 525851649 | 525852775 | 525852869 | 525855622 | 525856638 | 525852738 | 525853068 | 525857490 | 525853498 | 525854198 | 525852687 | 525854453 | 525853127 | 525852820 | 525854892 | 525853659 |
| C13 | 525848519 | 525848481 | 525849393 | 525848470 | 525849670 | 525848566 | 525849693 | 525849787 | 525852540 | 525853556 | 525849656 | 525849986 | 525854408 | 525850415 | 525851116 | 525849605 | 525851371 | 525850045 | 525849738 | 525851810 | 525850576 |
| C14 | 525847888 | 525847849 | 525848761 | 525847838 | 525849038 | 525847935 | 525849061 | 525849155 | 525851908 | 525852924 | 525849024 | 525849354 | 525853776 | 525849784 | 525850484 | 525848973 | 525850739 | 525849413 | 525849106 | 525851178 | 525849945 |
| C15 | 525842268 | 525842230 | 525843142 | 525842219 | 525843419 | 525842315 | 525843442 | 525843536 | 525846289 | 525847305 | 525843405 | 525843735 | 525848157 | 525844164 | 525844865 | 525843354 | 525845120 | 525843793 | 525843486 | 525845559 | 525844325 |
| C16 | 525846146 | 525846107 | 525847019 | 525846097 | 525847297 | 525846193 | 525847320 | 525847413 | 525850167 | 525851183 | 525847283 | 525847613 | 525852035 | 525848042 | 525848743 | 525847231 | 525848998 | 525847671 | 525847364 | 525849437 | 525848203 |
| C17 | 525845846 | 525845807 | 525846719 | 525845797 | 525846997 | 525845893 | 525847020 | 525847113 | 525849866 | 525850882 | 525846983 | 525847313 | 525851734 | 525847742 | 525848442 | 525846931 | 525848697 | 525847371 | 525847064 | 525849137 | 525847903 |
| C18 | 525842176 | 525842137 | 525843049 | 525842127 | 525843327 | 525842223 | 525843350 | 525843443 | 525846197 | 525847212 | 525843313 | 525843643 | 525848065 | 525844072 | 525844773 | 525843261 | 525845028 | 525843701 | 525843394 | 525845467 | 525844233 |
| H19 | 1089      | 1128      | 216       | 1138      | 62        | 1042      | 85        | 178       | 2932      | 3948      | 48        | 378       | 4800      | 807       | 1508      | 4         | 1763      | 436       | 129       | 2202      | 968       |
| H20 | 2660      | 2698      | 1787      | 2709      | 1509      | 2613      | 1486      | 1392      | 1361      | 2377      | 1523      | 1193      | 3229      | 764       | 63        | 1574      | 192       | 1135      | 1442      | 631       | 603       |
| H21 | 244       | 283       | 629       | 294       | 906       | 197       | 929       | 1023      | 3776      | 4792      | 892       | 1222      | 5644      | 1652      | 2352      | 841       | 2607      | 1281      | 974       | 3046      | 1813      |
| H22 | 25        | 63        | 849       | 74        | 1126      | 22        | 1149      | 1243      | 3996      | 5012      | 1112      | 1442      | 5864      | 1872      | 2572      | 1061      | 2827      | 1501      | 1194      | 3266      | 2032      |
| H23 | 44        | 83        | 829       | 93        | 1106      | 3         | 1130      | 1223      | 3976      | 4992      | 1092      | 1423      | 5844      | 1852      | 2552      | 1041      | 2807      | 1481      | 1174      | 3246      | 2013      |
| H24 | 702506001 | 39        | 873       | 49        | 1151      | 47        | 1174      | 1267      | 4021      | 5036      | 1137      | 1467      | 5889      | 1896      | 2597      | 1085      | 2852      | 1525      | 1218      | 3291      | 2057      |
| H25 | -11.91    | 702505962 | 912       | 11        | 1189      | 86        | 1213      | 1306      | 4059      | 5075      | 1175      | 1506      | 5927      | 1935      | 2635      | 1124      | 2890      | 1564      | 1257      | 3329      | 2096      |
| H26 | -11.56    | -11.47    | 702506874 | 922       | 277       | 826       | 301       | 394       | 3147      | 4163      | 263       | 594       | 5015      | 1023      | 1723      | 212       | 1978      | 652       | 345       | 2417      | 1184      |
| H27 | -0.24     | 0.16      | 0.07      | 702505952 | 1200      | 96        | 1223      | 1317      | 4070      | 5086      | 1186      | 1516      | 5938      | 1945      | 2646      | 1135      | 2901      | 1574      | 1267      | 3340      | 2106      |
| H28 | -0.15     | 0.16      | 0.38      | -11.57    | 702507152 | 1104      | 23        | 117       | 2870      | 3886      | 14        | 316       | 4738      | 745       | 1446      | 65        | 1701      | 374       | 67        | 2140      | 906       |
| H29 | 2.29      | -0.20     | -0.18     | -12.18    | -10.61    | 702506048 | 1127      | 1220      | 3973      | 4989      | 1090      | 1420      | 5842      | 1849      | 2549      | 1038      | 2804      | 1478      | 1171      | 3244      | 2010      |
| H30 | 0.00      | -0.10     | -0.10     | -0.10     | -0.31     | -0.36     | 702507175 | 93        | 2847      | 3863      | 37        | 293       | 4715      | 722       | 1423      | 89        | 1678      | 351       | 44        | 2117      | 883       |
| H31 | -0.16     | 0.13      | -0.26     | -0.31     | -0.45     | -0.42     | -9.56     | 702507268 | 2753      | 3769      | 131       | 200       | 4621      | 629       | 1329      | 182       | 1584      | 258       | 49        | 2023      | 790       |
| H32 | 0.01      | -0.14     | -0.05     | -0.31     | -0.43     | -0.48     | -6.17     | -9.78     | 702510022 | 1016      | 2884      | 2554      | 1868      | 2124      | 1424      | 2935      | 1169      | 2495      | 2802      | 730       | 1964      |
| H33 | 0.14      | 0.18      | 0.34      | 0.21      | 0.52      | 0.15      | -0.31     | -0.45     | -0.40     | 702511037 | 3900      | 3570      | 852       | 3140      | 2440      | 3951      | 2185      | 3511      | 3818      | 1746      | 2979      |
| H34 | 0.03      | 0.08      | 0.15      | 0.15      | 0.35      | 0.12      | -0.27     | -0.34     | -0.38     | -12.89    | 702507138 | 330       | 4752      | 759       | 1460      | 51        | 1715      | 388       | 81        | 2154      | 920       |
| H35 | 0.05      | 0.07      | 0.15      | 0.06      | 0.18      | 0.00      | -0.20     | -0.27     | -0.24     | -10.97    | -10.57    | 702507468 | 4422      | 429       | 1130      | 381       | 1385      | 58        | 249       | 1824      | 590       |
| H36 | -0.16     | -0.13     | -0.16     | -0.16     | -0.24     | -0.25     | -0.17     | -0.35     | -0.29     | 11.64     | 1.35      | 0.51      | 702511890 | 3992      | 3292      | 4803      | 3037      | 4363      | 4670      | 2598      | 3832      |
| H37 | -0.05     | -0.06     | -0.04     | -0.11     | -0.17     | -0.18     | -0.09     | -0.07     | -0.02     | 0.34      | -0.17     | 0.14      | 0.76      | 702507897 | 700       | 811       | 955       | 371       | 678       | 1395      | 161       |
| H38 | -0.11     | -0.13     | -0.12     | -0.21     | -0.34     | -0.31     | -0.11     | -0.05     | 0.02      | -0.14     | -0.39     | -0.05     | 1.01      | -7.46     | 702508598 | 1511      | 255       | 1071      | 1378      | 694       | 540       |
| H39 | -0.02     | -0.04     | -0.02     | -0.11     | -0.16     | -0.17     | 0.00      | 0.02      | 0.12      | -0.01     | 0.42      | 0.08      | -0.03     | 5.70      | 0.40      | 702507086 | 1766      | 440       | 133       | 2205      | 972       |
| H40 | -0.03     | -0.08     | -0.03     | -0.19     | -0.31     | -0.31     | 0.04      | 0.08      | 0.33      | -0.01     | -0.18     | -0.02     | -0.09     | 11.65     | 9.08      | -10.30    | 702508853 | 1326      | 1633      | 439       | 795       |
| H41 | 0.04      | 0.01      | 0.08      | -0.08     | -0.08     | -0.16     | 0.02      | -0.02     | 0.16      | 0.17      | -0.05     | 0.09      | 0.47      | -0.44     | 0.75      | 0.55      | 6.53      | 702507526 | 307       | 1765      | 532       |
| H42 | 0.02      | 0.00      | 0.05      | -0.06     | -0.07     | -0.13     | -0.03     | -0.05     | 0.05      | 0.13      | -0.03     | 0.10      | 0.00      | -0.12     | -0.32     | 5.86      | 12.92     | -9.70     | 702507219 | 2072      | 839       |
| H43 | 0.13      | 0.09      | 0.27      | -0.05     | 0.06      | -0.21     | -0.11     | -0.24     | 0.09      | 0.63      | 0.19      | 0.37      | -0.72     | 0.36      | -0.19     | -0.36     | 0.27      | 6.70      | 11.51     | 702509292 | 1234      |
| H44 | 0.07      | 0.05      | 0.15      | -0.02     | 0.05      | -0.10     | -0.10     | -0.17     | -0.04     | 0.79      | 0.43      | 0.13      | -0.13     | -0.41     | 0.18      | 0.69      | -0.22     | 0.37      | 8.28      | -7.71     | 702508058 |



**Table S5:** For Complex 3: on the diagonal are the Larmor frequencies for the nuclei, on the lower triangle of the matrix are the coupling constants between the two nuclei, on the upper triangle are the differences in Larmor frequencies between the two coupled nuclei.

|     | Cd1       | Te2       | Te3       | P4        | Si5       | F6        | F7        | C9        | C10       | C11       | C12       | C13       | C14       | C15       | C16       | C17       | C18       | H19       | H20       | H21       | H22       | H23       |
|-----|-----------|-----------|-----------|-----------|-----------|-----------|-----------|-----------|-----------|-----------|-----------|-----------|-----------|-----------|-----------|-----------|-----------|-----------|-----------|-----------|-----------|-----------|
| Cd1 | 155920342 | 66742136  | 66628154  | 128624917 | 16290421  | 505084765 | 505121481 | 20734037  | 20734228  | 20734350  | 20734259  | 20732821  | 20737857  | 20743908  | 20739462  | 20739730  | 20743350  | 546586691 | 546588122 | 546585960 | 546585692 | 546585695 |
| Te2 | -481.12   | 222662478 | 113983    | 61882781  | 83032558  | 438342629 | 438379344 | 46008099  | 46007908  | 46007787  | 46007877  | 46009316  | 46004280  | 45998228  | 46002675  | 46002406  | 45998787  | 479844555 | 479845986 | 479843823 | 479843556 | 479843559 |
| Te3 | -878.27   | 36.37     | 222548496 | 61996763  | 82918575  | 438456612 | 438493327 | 45894116  | 45893926  | 45893804  | 45893894  | 45895333  | 45890297  | 45884245  | 45888692  | 45888424  | 45884804  | 479958537 | 479959968 | 479957806 | 479957538 | 479957542 |
| P4  | 60.53     | 1.63      | 1504.62   | 284545259 | 144915338 | 376459848 | 376496564 | 107890880 | 107890689 | 107890567 | 107890657 | 107892096 | 107887060 | 107881008 | 107885455 | 107885187 | 107881567 | 417961774 | 417963205 | 417961043 | 417960775 | 417960778 |
| Si5 | 0.00      | 42.09     |           |           | 139629921 | 521375187 | 521411902 | 37024459  | 37024649  | 37024771  | 37024681  | 37023242  | 37028278  | 37034330  | 37029883  | 37030151  | 37033771  | 562877112 | 562878543 | 562876381 | 562876113 | 562876117 |
| F6  | 783.72    | 14.79     | 30.10     |           | 0.13      | 661005107 | 36716     | 484350728 | 484350537 | 484350415 | 484350506 | 484351945 | 484346909 | 484340857 | 484345303 | 484345035 | 484341416 | 41501926  | 41503357  | 41501194  | 41500927  | 41500930  |
| F7  | 784.66    | 10.85     | 87.43     |           | 0.68      | -9.11     | 661041823 | 484387443 | 484387253 | 484387131 | 484387221 | 484388660 | 484383624 | 484377572 | 484382019 | 484381751 | 484378131 | 41465210  | 41466641  | 41464479  | 41464211  | 41464215  |
| C9  | 6.48      | 195.52    |           |           | -33.74    | -0.22     | 0.75      | 176654380 | 191       | 312       | 222       | 1217      | 3819      | 9871      | 5424      | 5693      | 9312      | 525852654 | 525854085 | 525851922 | 525851655 | 525851658 |
| C10 |           | 1.01      |           |           | -38.53    | -0.03     | 0.53      | 3.82      | 176654570 | 122       | 31        | 1408      | 3629      | 9680      | 5234      | 5502      | 9122      | 525852463 | 525853894 | 525851732 | 525851464 | 525851467 |
| C11 |           | -7.50     |           |           | -40.35    | -0.04     | 0.07      | 4.72      | 3.48      | 176654692 | 90        | 1529      | 3507      | 9559      | 5112      | 5380      | 9000      | 525852341 | 525853772 | 525851610 | 525851342 | 525851346 |
| C12 |           | -19.07    |           |           | -41.38    | -0.14     | 7.83      | 4.72      | 3.14      | 3.57      | 176654602 | 1439      | 3597      | 9649      | 5202      | 5470      | 9090      | 525852431 | 525853862 | 525851700 | 525851432 | 525851436 |
| C13 | 8.88      | 163.74    |           |           | -2.46     | 12.16     | -0.20     | 2.96      | -0.06     | 0.12      | -0.09     | 176653163 | 5036      | 11088     | 6641      | 6909      | 10529     | 525853870 | 525855301 | 525853139 | 525852871 | 525852875 |
| C14 | 2.59      |           | 33.48     | 22.47     |           | 0.02      | 21.23     | -0.23     | 0.00      | 0.01      | 0.01      | -0.02     | 176658199 | 6052      | 1605      | 1873      | 5493      | 525848834 | 525850265 | 525848103 | 525847835 | 525847839 |
| C15 |           |           | 0.23      | 6.80      |           | -0.71     | -0.01     | 0.03      | -0.01     | 0.00      | -0.01     | -0.01     | 0.24      | 176664251 | 4447      | 4179      | 559       | 525842782 | 525844213 | 525842051 | 525841783 | 525841787 |
| C16 |           |           | -1.02     | 4.64      |           | 14.41     | -0.03     | -0.01     | -0.01     | 0.00      | -0.01     | 0.06      | 0.17      | 26.27     | 176659804 | 268       | 3888      | 525847229 | 525848660 | 525846498 | 525846230 | 525846234 |
| C17 |           |           | 0.74      |           |           | -0.84     | 0.32      | 0.00      | -0.01     | 0.00      | 0.00      | 0.00      | -0.03     | 0.09      | 23.64     | 176660072 | 3620      | 525846961 | 525848392 | 525846230 | 525845962 | 525845965 |
| C18 |           |           | -3.11     | 2.94      |           | -0.24     | 9.10      | 0.00      | -0.01     | 0.01      | 0.03      | -0.01     | 0.56      | 3.77      | 0.15      | 26.85     | 176663692 | 525843341 | 525844772 | 525842610 | 525842342 | 525842346 |
| H19 |           | -12.15    |           |           | 3.84      | 0.76      | 0.63      | 123.92    | 1.11      | -0.22     | 3.62      | 2.50      | 0.00      | -0.03     | -0.01     | 0.00      | 0.00      | 702507033 | 1431      | 731       | 999       | 995       |
| H20 |           | 3.43      |           |           | 4.03      | 1.07      | 1.88      | 133.03    | 4.19      | 1.40      | -0.35     | 0.80      | 0.03      | -0.01     | 0.01      | 0.03      | 0.06      | -8.05     | 702508464 | 2162      | 2430      | 2427      |
| H21 |           |           |           |           | 4.54      |           |           | 0.28      | 112.46    | 5.35      | 0.05      | -0.13     | -0.02     | -0.04     | -0.04     | -0.03     | -0.03     | 0.22      | -0.17     | 702506302 | 268       | 264       |
| H22 |           |           |           |           | 4.75      |           |           | 0.22      | 112.23    | 0.26      | 4.89      | -0.04     | -0.01     | -0.03     | -0.02     | -0.02     | -0.02     | 0.38      | -0.07     | -11.53    | 702506034 | 4         |
| H23 |           |           |           |           | 4.02      |           |           | 6.78      | 111.84    | -0.08     | 0.11      | -0.05     | 0.00      | -0.03     | -0.02     | -0.02     | -0.02     | 0.24      | 1.93      | -12.08    | -11.80    | 702506038 |
| H24 |           |           |           |           | 4.64      |           |           | 0.21      | 0.07      | 112.84    | 5.24      | -0.06     | 0.01      | -0.01     | 0.00      | 0.01      | 0.01      | 0.32      | 0.28      | -0.29     | 0.12      | 0.03      |
| H25 |           |           |           |           | 3.84      |           |           | 7.92      | -0.01     | 112.37    | 0.02      | 0.16      | 0.02      | -0.01     | -0.01     | 0.00      | 0.01      | -0.24     | 0.45      | -0.28     | 0.02      | 0.12      |
| H26 |           |           |           |           | 5.87      |           |           | 0.15      | 5.42      | 115.41    | 0.20      | -0.07     | 0.05      | 0.00      | 0.00      | 0.02      | 0.03      | 0.26      | 0.48      | 2.22      | -0.19     | -0.30     |
| H27 |           |           |           |           | 4.46      |           |           | 5.99      | -0.24     | 0.43      | 111.82    | -0.19     | 0.04      | -0.03     | -0.02     | -0.01     | 0.00      | 1.54      | -0.24     | 0.12      | -0.38     | 0.15      |
| H28 |           |           |           |           | 6.69      |           |           | 0.59      | 5.73      | -0.04     | 119.44    | -0.19     | 0.11      | -0.03     | -0.03     | 0.00      | 0.03      | -0.11     | 0.43      | -0.23     | 2.23      | -0.12     |
| H29 |           |           |           |           | 3.90      |           |           | -0.07     | 0.35      | 5.48      | 110.88    | 0.06      | 0.04      | -0.05     | -0.04     | -0.03     | -0.02     | -0.39     | 0.22      | 0.29      | -0.12     | 0.12      |
| H30 |           | -12.46    |           |           | 0.33      | 0.84      | 0.74      | 1.49      | -0.02     | 0.01      | -0.04     | 132.76    | -0.06     | -0.02     | 0.01      | -0.01     | -0.02     | 0.51      | 0.06      | -0.09     | 0.04      | -0.11     |
| H31 |           | -92.39    |           |           | -0.83     | -0.29     | -0.64     | 3.71      | -0.08     | 0.39      | -0.18     | 128.90    | -0.07     | -0.02     | 0.01      | -0.01     | -0.04     | -0.50     | -0.84     | -0.31     | -0.18     | -0.19     |
| H32 |           | 3.95      |           |           | 0.38      | -3.68     | 0.33      | 0.61      | -0.02     | -0.05     | -0.13     | 150.00    | -0.07     | 0.01      | 0.05      | 0.02      | 0.00      | 0.05      | 0.72      | -0.31     | -0.13     | -0.20     |
| H33 |           |           | 3.59      | -18.07    |           | -0.30     | -15.83    | 0.03      | -0.01     | 0.04      | 0.10      | -0.09     | 133.78    | -0.23     | -0.02     | 0.10      | 0.23      | -0.04     | 0.25      | -0.06     | -0.05     | 0.00      |
| H34 |           |           | -1.76     | -0.06     |           | -0.39     | -0.38     | -0.01     | -0.01     | 0.01      | 0.06      | -0.08     | 123.77    | 0.85      | 0.16      | -0.02     | 0.55      | -0.11     | 0.01      | -0.05     | -0.06     | -0.01     |
| H35 |           |           | 20.80     | -10.80    |           | -0.22     | -0.21     | 0.00      | -0.02     | 0.02      | 0.03      | -0.06     | 121.87    | -0.18     | 0.07      | 0.06      | 0.20      | -0.07     | 0.06      | -0.07     | -0.06     | -0.03     |
| H36 |           |           | -45.38    | 428.45    |           | -0.10     | 0.24      | -0.09     | -0.05     | -0.04     | -0.04     | -0.12     | 3.74      | -0.45     | 0.15      | 0.54      | 3.09      | -0.21     | -0.24     | -0.20     | -0.17     | -0.15     |
| H37 |           |           | 2.52      | 10.48     |           | 1.64      | 0.02      | -0.02     | -0.03     | -0.01     | -0.02     | 0.00      | -0.14     | 130.37    | -1.73     | 0.27      | 0.02      | -0.09     | -0.03     | -0.12     | -0.09     | -0.09     |
| H38 |           |           | 3.20      | 21.19     |           | 1.08      | -0.25     | -0.05     | -0.05     | -0.03     | -0.05     | 0.00      | -0.23     | 128.31    | -1.75     | 7.38      | 3.99      | -0.16     | -0.12     | -0.19     | -0.14     | -0.14     |
| H39 |           |           | -0.23     | 0.28      |           | 1.20      | 0.08      | 0.00      | -0.03     | -0.01     | -0.02     | 0.03      | 0.65      | 2.06      | 121.09    | -1.23     | 8.16      | -0.03     | 0.05      | -0.11     | -0.07     | -0.08     |
| H40 |           |           | 0.12      | -0.39     |           | -2.85     | 0.04      | 0.00      | -0.04     | -0.01     | -0.04     | 0.07      | -0.05     | -3.74     | 130.18    | -3.34     | 0.76      | -0.04     | 0.10      | -0.17     | -0.11     | -0.12     |
| H41 |           |           | 1.12      | 1.48      |           | 0.54      | 0.75      | 0.04      | -0.02     | 0.01      | -0.01     | 0.02      | 0.01      | 8.21      | -1.40     | 125.49    | 2.40      | 0.06      | 0.22      | -0.10     | -0.05     | -0.06     |
| H42 |           |           | -0.03     | 0.02      |           | 1.84      | 2.53      | 0.02      | -0.02     | 0.01      | 0.00      | 0.01      | 0.00      | 0.56      | -2.86     | 116.85    | -3.41     | 0.00      | 0.10      | -0.08     | -0.05     | -0.06     |
| H43 |           |           | -0.85     | 15.49     |           | 1.52      | 0.19      | 0.06      | -0.03     | 0.04      | 0.03      | -0.03     | 0.18      | 0.15      | 0.02      | -2.50     | 138.72    | 0.05      | 0.36      | -0.13     | -0.07     | -0.07     |
| H44 |           |           | -2.25     | 1.11      |           | 0.74      | 0.18      | 0.02      | -0.02     | 0.02      | 0.01      | -0.02     | 0.28      | 3.47      | 5.15      | -1.49     | 129.06    | 0.00      | 0.16      | -0.09     | -0.05     | -0.05     |



**cont. Table S5:** For Complex 3: on the diagonal are the Larmor frequencies for the nuclei, on the lower triangle of the matrix are the coupling constants between the two nuclei, on the upper triangle are the differences in Larmor frequencies between the two coupled nuclei.

|     | H24       | H25       | H26       | H27       | H28       | H29       | H30       | H31       | H32       | H33       | H34       | H35       | H36       | H37       | H38       | H39       | H40       | H41       | H42       | H43       | H44       |
|-----|-----------|-----------|-----------|-----------|-----------|-----------|-----------|-----------|-----------|-----------|-----------|-----------|-----------|-----------|-----------|-----------|-----------|-----------|-----------|-----------|-----------|
| Cd1 | 546585726 | 546585693 | 546586075 | 546585617 | 546587104 | 546585563 | 546586749 | 546586715 | 546589418 | 546590169 | 546586886 | 546587586 | 546591035 | 546587425 | 546588199 | 546586701 | 546588548 | 546587222 | 546586879 | 546588913 | 546587651 |
| Te2 | 479843590 | 479843556 | 479843938 | 479843481 | 479844968 | 479843427 | 479844613 | 479844579 | 479847282 | 479848033 | 479844750 | 479845450 | 479848899 | 479845289 | 479846063 | 479844565 | 479846412 | 479845086 | 479844743 | 479846777 | 479845515 |
| Te3 | 479957573 | 479957539 | 479957921 | 479957464 | 479958950 | 479957410 | 479958596 | 479958562 | 479961265 | 479962016 | 479958733 | 479959432 | 479962882 | 479959271 | 479960046 | 479958548 | 479960395 | 479959068 | 479958726 | 479960759 | 479959498 |
| P4  | 417960809 | 417960776 | 417961158 | 417960701 | 417962187 | 417960646 | 417961832 | 417961799 | 417964501 | 417965252 | 417961969 | 417962669 | 417966118 | 417962508 | 417963282 | 417961785 | 417963631 | 417962305 | 417961962 | 417963996 | 417962734 |
| Si5 | 562876148 | 562876114 | 562876496 | 562876039 | 562877525 | 562875985 | 562877171 | 562877137 | 562879840 | 562880591 | 562877308 | 562878007 | 562881457 | 562877846 | 562878621 | 562877123 | 562878970 | 562877643 | 562877301 | 562879334 | 562878073 |
| F6  | 41500961  | 41500927  | 41501310  | 41500852  | 41502339  | 41500798  | 41501984  | 41501950  | 41504653  | 41505404  | 41502121  | 41502821  | 41506270  | 41502660  | 41503434  | 41501936  | 41503783  | 41502457  | 41502114  | 41504148  | 41502886  |
| F7  | 41464246  | 41464212  | 41464594  | 41464137  | 41465623  | 41464083  | 41465268  | 41465235  | 41467937  | 41468688  | 41465405  | 41466105  | 41469555  | 41465944  | 41466718  | 41465221  | 41467068  | 41465741  | 41465398  | 41467432  | 41466170  |
| C9  | 525851689 | 525851655 | 525852037 | 525851580 | 525853067 | 525851526 | 525852712 | 525852678 | 525855381 | 525856132 | 525852849 | 525853549 | 525856998 | 525853388 | 525854162 | 525852664 | 525854511 | 525853185 | 525852842 | 525854876 | 525853614 |
| C10 | 525851498 | 525851465 | 525851847 | 525851389 | 525852876 | 525851335 | 525852521 | 525852487 | 525855190 | 525855941 | 525852658 | 525853358 | 525856807 | 525853197 | 525853971 | 525852473 | 525854320 | 525852994 | 525852651 | 525854685 | 525853423 |
| C11 | 525851377 | 525851343 | 525851725 | 525851268 | 525852754 | 525851214 | 525852399 | 525852366 | 525855068 | 525855819 | 525852536 | 525853236 | 525856686 | 525853075 | 525853849 | 525852352 | 525854199 | 525852872 | 525852529 | 525854563 | 525853301 |
| C12 | 525851467 | 525851433 | 525851815 | 525851358 | 525852844 | 525851304 | 525852490 | 525852456 | 525855159 | 525855910 | 525852627 | 525853326 | 525856776 | 525853166 | 525853940 | 525852442 | 525854289 | 525852963 | 525852620 | 525854654 | 525853392 |
| C13 | 525852906 | 525852872 | 525853254 | 525852797 | 525854283 | 525852743 | 525853929 | 525853895 | 525856598 | 525857349 | 525854066 | 525854765 | 525858215 | 525854604 | 525855379 | 525853881 | 525855728 | 525854401 | 525854059 | 525856092 | 525854831 |
| C14 | 525847870 | 525847836 | 525848218 | 525847761 | 525849247 | 525847707 | 525848893 | 525848859 | 525851561 | 525852312 | 525849030 | 525849729 | 525853179 | 525849568 | 525850343 | 525848845 | 525850692 | 525849365 | 525849022 | 525851056 | 525849795 |
| C15 | 525841818 | 525841784 | 525842166 | 525841709 | 525843196 | 525841655 | 525842841 | 525842807 | 525845510 | 525846261 | 525842978 | 525843677 | 525847127 | 525843517 | 525844291 | 525842793 | 525844640 | 525843314 | 525842971 | 525845005 | 525843743 |
| C16 | 525846265 | 525846231 | 525846613 | 525846156 | 525847642 | 525846102 | 525847287 | 525847254 | 525849956 | 525850707 | 525847424 | 525848124 | 525851574 | 525847963 | 525848737 | 525847240 | 525849087 | 525847760 | 525847417 | 525849451 | 525848190 |
| C17 | 525845996 | 525845963 | 525846345 | 525845887 | 525847374 | 525845833 | 525847019 | 525846986 | 525849688 | 525850439 | 525847156 | 525847856 | 525851305 | 525847695 | 525848469 | 525846971 | 525848818 | 525847492 | 525847149 | 525849183 | 525847921 |
| C18 | 525842377 | 525842343 | 525842725 | 525842268 | 525843754 | 525842214 | 525843400 | 525843366 | 525846069 | 525846820 | 525843537 | 525844236 | 525847686 | 525844075 | 525844850 | 525843352 | 525845199 | 525843872 | 525843530 | 525845563 | 525844302 |
| H19 | 965       | 998       | 616       | 1073      | 413       | 1128      | 58        | 25        | 2727      | 3478      | 195       | 895       | 4344      | 734       | 1508      | 11        | 1857      | 531       | 188       | 2222      | 960       |
| H20 | 2396      | 2429      | 2047      | 2505      | 1018      | 2559      | 1373      | 1406      | 1296      | 2047      | 1236      | 536       | 2913      | 697       | 77        | 1421      | 426       | 900       | 1243      | 791       | 471       |
| H21 | 233       | 267       | 115       | 342       | 1144      | 396       | 790       | 756       | 3459      | 4210      | 927       | 1626      | 5076      | 1465      | 2240      | 742       | 2589      | 1262      | 920       | 2953      | 1692      |
| H22 | 34        | 1         | 383       | 74        | 1412      | 129       | 1057      | 1024      | 3726      | 4477      | 1194      | 1894      | 5343      | 1733      | 2507      | 1010      | 2856      | 1530      | 1187      | 3221      | 1959      |
| H23 | 31        | 3         | 379       | 78        | 1409      | 132       | 1054      | 1020      | 3723      | 4474      | 1191      | 1891      | 5340      | 1730      | 2504      | 1006      | 2853      | 1527      | 1184      | 3218      | 1956      |
| H24 | 702506068 | 34        | 348       | 109       | 1378      | 163       | 1023      | 989       | 3692      | 4443      | 1160      | 1860      | 5309      | 1699      | 2473      | 975       | 2822      | 1496      | 1153      | 3187      | 1925      |
| H25 | -11.91    | 702506035 | 382       | 75        | 1411      | 129       | 1057      | 1023      | 3726      | 4477      | 1194      | 1893      | 5343      | 1732      | 2507      | 1009      | 2856      | 1529      | 1187      | 3220      | 1959      |
| H26 | -11.62    | -11.69    | 702506417 | 457       | 1029      | 511       | 674       | 641       | 3343      | 4094      | 811       | 1511      | 4961      | 1350      | 2124      | 627       | 2474      | 1147      | 804       | 2838      | 1576      |
| H27 | -0.11     | 0.17      | 0.05      | 702505960 | 1487      | 54        | 1132      | 1098      | 3801      | 4552      | 1269      | 1968      | 5418      | 1808      | 2582      | 1084      | 2931      | 1605      | 1262      | 3296      | 2034      |
| H28 | -0.25     | 0.16      | 0.32      | -11.67    | 702507446 | 1541      | 355       | 388       | 2314      | 3065      | 218       | 482       | 3931      | 321       | 1095      | 403       | 1444      | 118       | 225       | 1809      | 547       |
| H29 | 2.38      | -0.23     | -0.14     | -12.21    | -10.98    | 702505905 | 1186      | 1152      | 3855      | 4606      | 1323      | 2023      | 5472      | 1862      | 2636      | 1138      | 2985      | 1659      | 1316      | 3350      | 2088      |
| H30 | 0.01      | -0.09     | -0.08     | -0.17     | -0.36     | -0.50     | 702507091 | 34        | 2669      | 3420      | 137       | 837       | 4286      | 676       | 1450      | 48        | 1799      | 473       | 130       | 2164      | 902       |
| H31 | -0.18     | 0.11      | -0.25     | -0.37     | -0.48     | -0.59     | -9.41     | 702507058 | 2703      | 3454      | 171       | 870       | 4320      | 710       | 1484      | 14        | 1833      | 507       | 164       | 2198      | 936       |
| H32 | -0.02     | -0.14     | -0.03     | -0.32     | -0.34     | -0.56     | -5.70     | -9.33     | 702509760 | 751       | 2532      | 1832      | 1617      | 1993      | 1219      | 2717      | 870       | 2196      | 2539      | 505       | 1767      |
| H33 | 0.09      | 0.13      | 0.24      | 0.23      | 0.47      | 0.23      | -0.25     | -0.32     | -0.26     | 702510511 | 3283      | 2583      | 866       | 2744      | 1970      | 3468      | 1621      | 2947      | 3290      | 1256      | 2518      |
| H34 | 0.02      | 0.06      | 0.11      | 0.16      | 0.31      | 0.17      | -0.24     | -0.27     | -0.28     | -12.95    | 702507228 | 700       | 4149      | 539       | 1313      | 185       | 1662      | 336       | 7         | 2027      | 765       |
| H35 | 0.03      | 0.05      | 0.11      | 0.09      | 0.20      | 0.06      | -0.17     | -0.21     | -0.17     | -10.72    | -10.59    | 702507928 | 3449      | 161       | 613       | 884       | 962       | 364       | 707       | 1327      | 65        |
| H36 | -0.13     | -0.11     | -0.13     | -0.13     | -0.20     | -0.21     | -0.24     | -0.30     | -0.28     | 12.33     | 1.19      | 1.13      | 702511377 | 3610      | 2836      | 4334      | 2487      | 3813      | 4156      | 2122      | 3384      |
| H37 | -0.04     | -0.04     | -0.02     | -0.08     | -0.10     | -0.13     | -0.06     | -0.05     | 0.02      | 0.26      | -0.11     | 0.08      | 0.70      | 702507767 | 774       | 724       | 1123      | 203       | 546       | 1488      | 226       |
| H38 | -0.08     | -0.09     | -0.07     | -0.16     | -0.22     | -0.24     | -0.08     | -0.02     | 0.06      | -0.14     | -0.38     | -0.07     | 0.93      | -8.02     | 702508541 | 1498      | 349       | 977       | 1320      | 714       | 548       |
| H39 | -0.02     | -0.03     | 0.00      | -0.08     | -0.09     | -0.13     | 0.02      | 0.04      | 0.14      | 0.00      | 0.39      | 0.08      | -0.04     | 5.56      | 0.43      | 702507044 | 1847      | 521       | 178       | 2212      | 950       |
| H40 | -0.02     | -0.05     | 0.00      | -0.13     | -0.17     | -0.23     | 0.06      | 0.10      | 0.34      | 0.03      | -0.16     | -0.01     | -0.09     | 11.84     | 8.85      | -11.05    | 702508891 | 1326      | 1669      | 365       | 897       |
| H41 | 0.04      | 0.02      | 0.08      | -0.04     | 0.01      | -0.10     | 0.03      | -0.01     | 0.16      | 0.18      | -0.04     | 0.08      | 0.42      | -0.40     | 0.85      | 0.52      | 6.76      | 702507564 | 343       | 1691      | 429       |
| H42 | 0.02      | 0.00      | 0.05      | -0.03     | -0.01     | -0.08     | -0.02     | -0.03     | 0.07      | 0.13      | -0.02     | 0.09      | 0.03      | -0.12     | -0.30     | 6.05      | 13.07     | -9.95     | 702507221 | 2034      | 772       |
| H43 | 0.10      | 0.08      | 0.21      | 0.05      | 0.24      | -0.04     | -0.10     | -0.19     | 0.04      | 0.52      | 0.24      | 0.33      | -1.05     | 0.19      | -0.23     | -0.43     | 0.22      | 7.15      | 11.26     | 702509255 | 1262      |
| H44 | 0.05      | 0.04      | 0.12      | 0.02      | 0.11      | -0.03     | -0.08     | -0.13     | -0.02     | 0.65      | 0.44      | 0.14      | -0.29     | -0.39     | 0.13      | 0.60      | -0.25     | 0.46      | 8.77      | -8.34     | 702507993 |



**Table S6:** For Complex 4: on the diagonal are the Larmor frequencies for the nuclei, on the lower triangle of the matrix are the coupling constants between the two nuclei, on the upper triangle are the differences in Larmor frequencies between the two coupled nuclei.

|     | Cd1       | Se2       | Se3       | P4        | Si5       | F6        | F7        | C9        | C10       | C11       | C12       | C13       | C14       | C15       | C16       | C17       | C18       | H19       | H20       | H21       | H22       | H23       |           |
|-----|-----------|-----------|-----------|-----------|-----------|-----------|-----------|-----------|-----------|-----------|-----------|-----------|-----------|-----------|-----------|-----------|-----------|-----------|-----------|-----------|-----------|-----------|-----------|
| Cd1 | 155916644 | 21582334  | 21614648  | 128641915 | 16287029  | 505080108 | 505118628 | 20741477  | 20738311  | 20737775  | 20737907  | 20740666  | 20741350  | 20747056  | 20743265  | 20743404  | 20747038  | 546590629 | 546591985 | 546589394 | 546589524 | 546589441 |           |
| Se2 | 105.44    | 155916644 | 32314     | 150224249 | 5295305   | 526662441 | 526700962 | 42323811  | 42320645  | 42320109  | 42320241  | 42322999  | 42323684  | 42329390  | 42325599  | 42325737  | 42329372  | 568172963 | 568174319 | 568171728 | 568171858 | 568171775 |           |
| Se3 | 233.79    | 4.87      | 134301996 | 150256563 | 5327619   | 526694755 | 526733276 | 42356125  | 42352959  | 42352423  | 42352555  | 42355313  | 42355998  | 42361704  | 42357913  | 42358051  | 42361686  | 568205277 | 568206633 | 568204042 | 568204172 | 568204089 |           |
| P4  | 50.86     | 0.09      | -660.24   | 284558559 | 144928944 | 376438192 | 376476713 | 107900438 | 107903604 | 107904140 | 107904008 | 107901250 | 107900565 | 107894859 | 107898650 | 107898512 | 107894877 | 417948714 | 417950070 | 417947479 | 417947609 | 417947526 |           |
| Si5 | 0.62      | -15.12    |           |           | 139629615 | 521367136 | 521405657 | 37028505  | 37025340  | 37024804  | 37024935  | 37027694  | 37028379  | 37034085  | 37030294  | 37030432  | 37034067  | 562877658 | 562879014 | 562876423 | 562876552 | 562876469 |           |
| F6  | 677.95    | -4.18     | -4.62     |           | 0.12      | 660996751 | 38521     | 484338631 | 484341796 | 484342332 | 484342201 | 484339442 | 484338757 | 484333051 | 484336842 | 484336704 | 484333070 | 41510522  | 41511878  | 41509287  | 41509416  | 41509333  |           |
| F7  | 691.68    | 4.54      | -26.06    |           | 0.51      | -7.23     | 661035272 | 484377152 | 484380317 | 484380853 | 484380722 | 484377963 | 484377278 | 484371572 | 484375363 | 484375225 | 484371590 | 41472001  | 41473357  | 41470766  | 41470895  | 41470812  |           |
| C9  | 6.76      | -81.18    |           |           | -32.89    | 3.39      | -0.31     | 176658121 | 3166      | 3701      | 3570      | 811       | 127       | 5579      | 1788      | 1927      | 5561      | 525849153 | 525850508 | 525847918 | 525848047 | 525847964 |           |
| C10 |           | 4.51      |           |           | -39.00    | 0.00      | 0.61      | 5.20      | 176654955 |           | 536       | 404       | 2354      | 3039      | 8745      | 4954      | 5092      | 8727      | 525852318 | 525853674 | 525851083 | 525851213 | 525851130 |
| C11 |           | -0.26     |           |           | -42.09    | -0.11     | 9.53      | 3.87      | 3.13      | 176654419 | 131       | 2890      | 3575      | 9281      | 5490      | 5628      | 9263      | 525852854 | 525854210 | 525851619 | 525851748 | 525851665 |           |
| C12 |           | 7.85      |           |           | -39.32    | 0.21      | -0.01     | 3.87      | 3.34      | 3.56      | 176654551 | 2759      | 3443      | 9149      | 5358      | 5497      | 9131      | 525852723 | 525854078 | 525851488 | 525851617 | 525851534 |           |
| C13 | 9.60      | -69.04    |           |           | -3.37     | 4.42      | 0.05      | 2.53      | 0.13      | 0.02      | -0.18     | 176657309 | 685       | 6391      | 2600      | 2738      | 6372      | 525849964 | 525851320 | 525848729 | 525848858 | 525848775 |           |
| C14 | 3.44      |           | -9.21     | 29.75     |           | -0.05     | 19.42     | -0.50     | 0.00      | 0.05      | 0.00      | -0.02     | 176657994 | 5706      | 1915      | 2053      | 5688      | 525849279 | 525850635 | 525848044 | 525848173 | 525848091 |           |
| C15 |           |           | 0.01      | 6.76      |           | -0.83     | 0.02      | -0.01     | -0.01     | 0.00      | -0.01     | -0.01     | 0.22      | 176663700 | 3791      | 3653      | 18        | 525843573 | 525844929 | 525842338 | 525842467 | 525842384 |           |
| C16 |           |           | 0.45      | 4.92      |           | 12.12     | -0.05     | -0.01     | 0.00      | 0.00      | -0.01     | 0.01      | 0.10      | 26.22     | 176659909 | 138       | 3773      | 525847364 | 525848720 | 525846129 | 525846259 | 525846176 |           |
| C17 |           |           | -0.24     |           |           | -0.36     | 0.16      | 0.02      | 0.00      | 0.00      | -0.01     | -0.01     | -0.03     | 0.09      | 23.76     | 176660047 | 3634      | 525847226 | 525848582 | 525845991 | 525846120 | 525846037 |           |
| C18 |           |           | 0.16      | 3.76      |           | -0.20     | 9.98      | 0.00      | 0.00      | 0.01      | -0.01     | -0.02     | 0.67      | 3.92      | 0.13      | 26.73     | 176663682 | 525843591 | 525844947 | 525842356 | 525842486 | 525842403 |           |
| H19 |           | 5.31      |           |           | 3.81      | 0.27      | -0.12     | 124.00    | 2.00      | 3.10      | -0.37     | 1.95      | -0.06     | -0.03     | -0.01     | -0.02     | -0.04     | 702507273 | 1356      | 1235      | 1106      | 1189      |           |
| H20 |           | 2.76      |           |           | 3.93      | 0.36      | -0.02     | 132.86    | -0.29     | 1.26      | 3.27      | 2.72      | -0.06     | -0.01     | 0.03      | 0.01      | -0.01     | -8.83     | 702508629 | 2591      | 2462      | 2545      |           |
| H21 |           |           |           |           | 4.78      |           |           | 0.12      | 112.68    | 4.72      | 0.32      | -0.06     | -0.02     | -0.02     | -0.01     | -0.01     | -0.02     | 0.27      | 0.29      | 702506038 | 129       | 46        |           |
| H22 |           |           |           |           | 4.80      |           |           | 0.29      | 112.86    | 0.05      | 5.54      | -0.05     | -0.02     | -0.01     | 0.00      | 0.00      | -0.01     | 0.16      | 0.26      | -11.66    | 702506168 | 83        |           |
| H23 |           |           |           |           | 3.95      |           |           | 7.99      | 112.27    | 0.12      | -0.01     | 0.16      | -0.01     | -0.02     | -0.01     | -0.01     | -0.01     | 0.62      | -0.24     | -11.67    | -12.11    | 702506085 |           |
| H24 |           |           |           |           | 5.32      |           |           | 0.37      | 0.09      | 112.07    | 5.73      | -0.05     | 0.00      | 0.00      | 0.02      | 0.03      | 0.03      | -0.11     | 0.43      | -0.28     | 0.15      | 0.04      |           |
| H25 |           |           |           |           | 4.47      |           |           | 6.85      | 0.21      | 110.23    | -0.10     | 0.05      | 0.02      | -0.01     | 0.00      | 0.01      | 0.02      | 1.29      | 0.26      | -0.23     | 0.02      | 0.16      |           |
| H26 |           |           |           |           | 4.73      |           |           | -0.13     | 6.48      | 120.02    | 0.22      | -0.14     | 0.05      | -0.01     | 0.01      | 0.02      | 0.07      | -0.30     | 0.29      | 2.56      | -0.26     | -0.22     |           |
| H27 |           |           |           |           | 4.53      |           |           | 5.30      | 0.25      | -0.10     | 112.22    | -0.23     | 0.00      | -0.03     | -0.02     | -0.01     | -0.01     | -0.34     | 1.23      | -0.01     | -0.24     | 0.10      |           |
| H28 |           |           |           |           | 4.53      |           |           | -0.04     | 5.71      | 0.26      | 113.36    | 0.02      | 0.01      | -0.04     | -0.04     | -0.02     | -0.01     | 0.06      | -0.34     | -0.20     | 2.31      | -0.32     |           |
| H29 |           |           |           |           | 4.62      |           |           | 0.33      | 0.06      | 5.22      | 113.30    | -0.13     | -0.02     | -0.04     | -0.03     | -0.03     | -0.03     | 0.13      | -0.20     | 0.13      | -0.32     | 0.04      |           |
| H30 |           | 7.24      |           |           | 0.40      | 0.21      | 1.35      | 1.04      | -0.03     | -0.02     | -0.09     | 133.17    | -0.07     | -0.02     | -0.01     | -0.03     | -0.05     | 0.63      | 0.26      | 0.02      | 0.01      | -0.09     |           |
| H31 |           | 34.71     |           |           | -1.52     | 0.35      | -0.80     | 4.82      | 0.40      | -0.03     | -0.16     | 128.17    | -0.08     | -0.02     | -0.02     | -0.03     | -0.06     | -0.62     | -0.30     | -0.16     | -0.13     | 0.16      |           |
| H32 |           | 1.80      |           |           | 0.30      | 0.31      | -0.52     | 1.67      | 0.01      | -0.04     | 0.01      | 144.53    | -0.09     | 0.00      | 0.03      | -0.01     | -0.04     | 0.26      | 0.72      | -0.04     | 0.03      | -0.08     |           |
| H33 |           |           | -1.20     | -19.64    |           | -0.49     | -12.61    | -0.06     | -0.02     | 0.04      | 0.01      | -0.11     | 133.42    | -0.21     | -0.02     | 0.08      | 0.21      | -0.23     | -0.23     | -0.09     | -0.07     | -0.04     |           |
| H34 |           |           | 0.75      | -2.40     |           | -0.44     | -0.14     | -0.06     | -0.03     | 0.00      | 0.00      | -0.07     | 123.26    | 0.89      | 0.16      | -0.02     | 0.65      | -0.21     | -0.25     | -0.09     | -0.09     | -0.06     |           |
| H35 |           |           | -4.23     | -7.19     |           | -0.24     | -0.16     | -0.05     | -0.02     | 0.01      | -0.01     | -0.06     | 120.86    | -0.17     | 0.08      | 0.08      | 0.26      | -0.17     | -0.16     | -0.08     | -0.06     | -0.05     |           |
| H36 |           |           | 28.59     | 451.89    |           | 0.29      | 0.93      | -0.09     | -0.05     | -0.05     | -0.05     | -0.07     | 5.62      | -0.48     | 0.26      | 0.56      | 2.41      | -0.15     | -0.32     | -0.17     | -0.17     | -0.15     |           |
| H37 |           |           | 0.18      | 6.72      |           | 1.24      | -0.19     | -0.03     | -0.02     | -0.01     | -0.03     | -0.01     | -0.10     | 129.55    | -1.64     | 0.38      | -0.17     | -0.10     | -0.03     | -0.07     | -0.04     | -0.05     |           |
| H38 |           |           | -0.64     | 16.31     |           | 0.82      | -0.32     | -0.04     | -0.03     | -0.02     | -0.05     | 0.01      | -0.24     | 129.42    | -1.82     | 7.75      | 4.43      | -0.14     | -0.04     | -0.10     | -0.06     | -0.09     |           |
| H39 |           |           | 0.09      | 0.42      |           | 0.66      | 0.07      | 0.01      | -0.01     | 0.01      | -0.03     | 0.01      | 0.59      | 1.83      | 121.22    | -1.24     | 8.10      | -0.03     | 0.09      | -0.04     | 0.00      | -0.03     |           |
| H40 |           |           | -0.10     | -0.32     |           | -1.23     | 0.07      | 0.03      | -0.01     | 0.02      | -0.04     | 0.02      | -0.06     | -3.80     | 129.51    | -2.83     | 0.71      | -0.02     | 0.23      | -0.05     | 0.01      | -0.04     |           |
| H41 |           |           | -0.32     | 1.62      |           | 0.64      | 0.72      | 0.01      | -0.01     | 0.04      | -0.02     | -0.02     | -0.01     | 8.06      | -1.37     | 124.91    | 2.43      | -0.03     | 0.11      | -0.03     | 0.02      | -0.01     |           |
| H42 |           |           | -0.03     | 0.06      |           | 2.40      | 2.38      | 0.00      | -0.01     | 0.02      | -0.02     | -0.02     | -0.01     | 0.52      | -2.96     | 117.18    | -3.42     | -0.05     | 0.03      | -0.04     | -0.01     | -0.02     |           |
| H43 |           |           | 1.52      | 10.80     |           | 0.49      | -1.31     | -0.03     | -0.02     | 0.07      | -0.02     | -0.09     | 0.11      | 0.32      | 0.01      | -2.47     | 137.77    | -0.15     | -0.02     | -0.07     | -0.01     | -0.02     |           |
| H44 |           |           | 1.87      | -0.30     |           | 0.24      | 0.56      | -0.02     | -0.01     | 0.03      | -0.01     | -0.05     | 0.41      | 2.88      | 4.69      | -1.61     | 129.05    | -0.11     | -0.04     | -0.06     | -0.02     | -0.03     |           |



**cont. Table S6:** For Complex 4: on the diagonal are the Larmor frequencies for the nuclei, on the lower triangle of the matrix are the coupling constants between the two nuclei, on the upper triangle are the differences in Larmor frequencies between the two coupled nuclei.

|     | H24       | H25       | H26       | H27       | H28       | H29       | H30       | H31       | H32       | H33       | H34       | H35       | H36       | H37       | H38       | H39       | H40       | H41       | H42       | H43       | H44       |
|-----|-----------|-----------|-----------|-----------|-----------|-----------|-----------|-----------|-----------|-----------|-----------|-----------|-----------|-----------|-----------|-----------|-----------|-----------|-----------|-----------|-----------|
| Cd1 | 546589425 | 546589256 | 546591168 | 546589463 | 546589585 | 546589430 | 546590711 | 546590704 | 546592099 | 546593453 | 546590488 | 546590849 | 546595138 | 546591216 | 546592117 | 546590450 | 546592156 | 546590870 | 546590608 | 546592801 | 546591417 |
| Se2 | 568171759 | 568171590 | 568173502 | 568171797 | 568171919 | 568171764 | 568173045 | 568173038 | 568174433 | 568175787 | 568172821 | 568173183 | 568177472 | 568173550 | 568174451 | 568172783 | 568174490 | 568173204 | 568172942 | 568175135 | 568173751 |
| Se3 | 568204073 | 568203904 | 568205816 | 568204111 | 568204233 | 568204078 | 568205359 | 568205352 | 568206747 | 568208101 | 568205135 | 568205497 | 568209786 | 568205864 | 568206765 | 568205097 | 568206804 | 568205518 | 568205256 | 568207449 | 568206065 |
| P4  | 417947510 | 417947341 | 417949253 | 417947548 | 417947670 | 417947515 | 417948796 | 417948789 | 417950184 | 417951538 | 417948572 | 417948934 | 417953223 | 417949301 | 417950202 | 417948534 | 417950241 | 417948955 | 417948693 | 417950886 | 417949502 |
| Si5 | 562876454 | 562876285 | 562878197 | 562876492 | 562876613 | 562876459 | 562877740 | 562877733 | 562879128 | 562880482 | 562877516 | 562877878 | 562882167 | 562878245 | 562879145 | 562877478 | 562879185 | 562877898 | 562877637 | 562879830 | 562878446 |
| F6  | 41509318  | 41509148  | 41511061  | 41509356  | 41509477  | 41509323  | 41510603  | 41510596  | 41511992  | 41513345  | 41510380  | 41510742  | 41515031  | 41511108  | 41512009  | 41510342  | 41512048  | 41510762  | 41510501  | 41512693  | 41511309  |
| F7  | 41470797  | 41470628  | 41472540  | 41470835  | 41470956  | 41470802  | 41472082  | 41472075  | 41473471  | 41474824  | 41471859  | 41472221  | 41476510  | 41472588  | 41473488  | 41471821  | 41473528  | 41472241  | 41471980  | 41474173  | 41472789  |
| C9  | 525847948 | 525847779 | 525849691 | 525847986 | 525848108 | 525847953 | 525849234 | 525849227 | 525850622 | 525851976 | 525849011 | 525849372 | 525853661 | 525849739 | 525850640 | 525848973 | 525850679 | 525849393 | 525849131 | 525851324 | 525849940 |
| C10 | 525851114 | 525850945 | 525852857 | 525851152 | 525851274 | 525851119 | 525852400 | 525852393 | 525853788 | 525855142 | 525852176 | 525852538 | 525856827 | 525852905 | 525853806 | 525852138 | 525853845 | 525852559 | 525852297 | 525854490 | 525853106 |
| C11 | 525851650 | 525851481 | 525853393 | 525851688 | 525851809 | 525851655 | 525852936 | 525852928 | 525854324 | 525855677 | 525852712 | 525853074 | 525857363 | 525853441 | 525854341 | 525852674 | 525854381 | 525853094 | 525852833 | 525855026 | 525853642 |
| C12 | 525851518 | 525851349 | 525853261 | 525851556 | 525851678 | 525851523 | 525852804 | 525852797 | 525854192 | 525855546 | 525852581 | 525852942 | 525857231 | 525853309 | 525854210 | 525852543 | 525854249 | 525852963 | 525852701 | 525854894 | 525853510 |
| C13 | 525848760 | 525848590 | 525850503 | 525848798 | 525848919 | 525848765 | 525850045 | 525850038 | 525851434 | 525852787 | 525849822 | 525850184 | 525854473 | 525850551 | 525851451 | 525849784 | 525851491 | 525850204 | 525849943 | 525852135 | 525850751 |
| C14 | 525848075 | 525847906 | 525849818 | 525848113 | 525848235 | 525848080 | 525849361 | 525849354 | 525850749 | 525852103 | 525849137 | 525849499 | 525853788 | 525849866 | 525850767 | 525849099 | 525850806 | 525849520 | 525849258 | 525851451 | 525850067 |
| C15 | 525842369 | 525842200 | 525844112 | 525842407 | 525842528 | 525842374 | 525843655 | 525843648 | 525845043 | 525846397 | 525843431 | 525843793 | 525848082 | 525844160 | 525845060 | 525843393 | 525845100 | 525843813 | 525843552 | 525845745 | 525844361 |
| C16 | 525846160 | 525845991 | 525847903 | 525846198 | 525846320 | 525846165 | 525847446 | 525847439 | 525848834 | 525850188 | 525847222 | 525847584 | 525851873 | 525847951 | 525848852 | 525847184 | 525848891 | 525847605 | 525847343 | 525849536 | 525848152 |
| C17 | 525846022 | 525845853 | 525847765 | 525846060 | 525846181 | 525846027 | 525847307 | 525847300 | 525848696 | 525850049 | 525847084 | 525847446 | 525851735 | 525847813 | 525848713 | 525847046 | 525848753 | 525847466 | 525847205 | 525849397 | 525848013 |
| C18 | 525842387 | 525842218 | 525844130 | 525842425 | 525842547 | 525842392 | 525843673 | 525843666 | 525845061 | 525846415 | 525843450 | 525843811 | 525848100 | 525844178 | 525845079 | 525843412 | 525845118 | 525843832 | 525843570 | 525845763 | 525844379 |
| H19 | 1204      | 1373      | 539       | 1166      | 1045      | 1199      | 81        | 74        | 1470      | 2823      | 142       | 220       | 4509      | 587       | 1487      | 180       | 1527      | 240       | 21        | 2172      | 788       |
| H20 | 2560      | 2729      | 817       | 2522      | 2401      | 2555      | 1274      | 1281      | 114       | 1468      | 1498      | 1136      | 3153      | 769       | 131       | 1536      | 171       | 1116      | 1377      | 816       | 568       |
| H21 | 31        | 138       | 1774      | 69        | 190       | 36        | 1317      | 1310      | 2705      | 4059      | 1093      | 1455      | 5744      | 1822      | 2722      | 1055      | 2762      | 1475      | 1214      | 3407      | 2023      |
| H22 | 98        | 268       | 1645      | 60        | 61        | 93        | 1187      | 1180      | 2575      | 3929      | 964       | 1326      | 5615      | 1692      | 2593      | 926       | 2632      | 1346      | 1085      | 3277      | 1893      |
| H23 | 15        | 185       | 1728      | 22        | 144       | 11        | 1270      | 1263      | 2658      | 4012      | 1047      | 1409      | 5698      | 1775      | 2676      | 1009      | 2715      | 1429      | 1168      | 3360      | 1976      |
| H24 | 702506069 | 169       | 1743      | 38        | 159       | 5         | 1286      | 1279      | 2674      | 4028      | 1062      | 1424      | 5713      | 1791      | 2691      | 1024      | 2731      | 1444      | 1183      | 3376      | 1992      |
| H25 | -11.56    | 702505900 | 1912      | 207       | 329       | 174       | 1455      | 1448      | 2843      | 4197      | 1232      | 1593      | 5882      | 1960      | 2861      | 1194      | 2900      | 1614      | 1352      | 3545      | 2161      |
| H26 | -12.28    | -12.61    | 702507812 | 1705      | 1583      | 1738      | 457       | 464       | 931       | 2285      | 681       | 319       | 3970      | 48        | 948       | 719       | 988       | 299       | 560       | 1633      | 249       |
| H27 | -0.29     | 0.16      | 0.14      | 702506107 | 122       | 33        | 1248      | 1241      | 2636      | 3990      | 1024      | 1386      | 5675      | 1753      | 2653      | 986       | 2693      | 1406      | 1145      | 3338      | 1954      |
| H28 | -0.20     | 0.11      | 0.32      | -12.38    | 702506229 | 155       | 1126      | 1119      | 2514      | 3868      | 903       | 1265      | 5553      | 1631      | 2532      | 865       | 2571      | 1285      | 1024      | 3216      | 1832      |
| H29 | 2.28      | -0.33     | -0.23     | -11.78    | -11.31    | 702506074 | 1281      | 1274      | 2669      | 4023      | 1057      | 1419      | 5708      | 1786      | 2686      | 1019      | 2726      | 1439      | 1178      | 3371      | 1987      |
| H30 | -0.12     | -0.15     | -0.25     | -0.19     | -0.35     | -0.14     | 702507355 | 7         | 1388      | 2742      | 223       | 138       | 4427      | 505       | 1406      | 261       | 1445      | 159       | 103       | 2090      | 706       |
| H31 | -0.22     | -0.15     | -0.39     | -0.26     | -0.40     | -0.27     | -9.57     | 702507348 | 1395      | 2749      | 216       | 145       | 4434      | 512       | 1413      | 254       | 1452      | 166       | 96        | 2097      | 713       |
| H32 | 0.01      | -0.15     | -0.20     | -0.11     | -0.40     | -0.24     | -6.69     | -9.39     | 702508743 | 1354      | 1612      | 1250      | 3039      | 883       | 18        | 1650      | 57        | 1229      | 1491      | 702       | 682       |
| H33 | 0.08      | 0.11      | 0.31      | 0.04      | 0.10      | -0.03     | -0.30     | -0.33     | -0.40     | 702510097 | 2965      | 2604      | 1685      | 2237      | 1336      | 3003      | 1297      | 2583      | 2845      | 652       | 2036      |
| H34 | -0.04     | 0.01      | 0.05      | 0.00      | 0.03      | -0.05     | -0.23     | -0.23     | -0.31     | -12.87    | 702507131 | 362       | 4651      | 729       | 1629      | 38        | 1669      | 382       | 121       | 2313      | 929       |
| H35 | 0.01      | 0.03      | 0.08      | -0.01     | 0.00      | -0.06     | -0.20     | -0.23     | -0.25     | -11.02    | -10.90    | 702507493 | 4289      | 367       | 1267      | 400       | 1307      | 20        | 241       | 1952      | 568       |
| H36 | -0.21     | -0.17     | -0.28     | -0.17     | -0.23     | -0.21     | -0.29     | -0.30     | -0.31     | 11.24     | 1.20      | 0.51      | 702511782 | 3922      | 3022      | 4689      | 2982      | 4269      | 4530      | 2337      | 3721      |
| H37 | 0.00      | -0.03     | -0.04     | -0.08     | -0.12     | -0.11     | -0.07     | -0.06     | 0.00      | 0.22      | -0.16     | 0.07      | 0.94      | 702507860 | 901       | 766       | 940       | 346       | 608       | 1585      | 201       |
| H38 | -0.03     | -0.07     | -0.14     | -0.14     | -0.22     | -0.18     | -0.04     | 0.01      | 0.13      | -0.17     | -0.39     | -0.10     | 0.86      | -7.85     | 702508761 | 1667      | 39        | 1247      | 1508      | 684       | 700       |
| H39 | 0.06      | 0.01      | 0.02      | -0.07     | -0.11     | -0.10     | -0.02     | -0.02     | 0.09      | -0.03     | 0.39      | 0.09      | -0.04     | 5.37      | 0.38      | 702507093 | 1706      | 420       | 159       | 2351      | 967       |
| H40 | 0.15      | 0.03      | 0.06      | -0.11     | -0.18     | -0.16     | -0.02     | -0.04     | 0.21      | -0.01     | -0.18     | -0.03     | -0.14     | 11.69     | 8.56      | -11.31    | 702508800 | 1286      | 1548      | 645       | 739       |
| H41 | 0.15      | 0.08      | 0.16      | -0.04     | -0.05     | -0.08     | -0.08     | -0.12     | 0.00      | 0.15      | -0.05     | 0.07      | 0.34      | -0.40     | 0.88      | 0.46      | 6.84      | 702507514 | 261       | 1931      | 547       |
| H42 | 0.07      | 0.04      | 0.07      | -0.04     | -0.06     | -0.07     | -0.07     | -0.09     | -0.02     | 0.11      | -0.04     | 0.07      | -0.01     | -0.13     | -0.33     | 6.23      | 13.31     | -10.14    | 702507252 | 2193      | 809       |
| H43 | 0.23      | 0.15      | 0.31      | -0.02     | -0.02     | -0.10     | -0.25     | -0.33     | -0.24     | 0.41      | 0.24      | 0.41      | -0.55     | 0.26      | -0.28     | -0.49     | 0.14      | 7.37      | 11.10     | 702509445 | 1384      |
| H44 | 0.09      | 0.06      | 0.13      | -0.03     | -0.03     | -0.07     | -0.15     | -0.19     | -0.14     | 0.52      | 0.35      | 0.09      | 0.16      | -0.26     | 0.14      | 0.47      | -0.31     | 0.51      | 9.19      | -8.01     | 702508061 |



**Table S7:** For molecule 1: ratio analysis,  $\Delta\omega_0/J \geq 10$  (Data from **Table S3**).

|     | Te2   | Te3   | P4       | Si5       | F6         | F7          | C9          | C10          | C11         | C12         | C13         | C14        | C15         | C16          | C17        | C18       | H19          | H20          | H21           | H22           | H23          |
|-----|-------|-------|----------|-----------|------------|-------------|-------------|--------------|-------------|-------------|-------------|------------|-------------|--------------|------------|-----------|--------------|--------------|---------------|---------------|--------------|
| Hg  | 29310 | 18947 | -954054  | 102521625 | -204150    | -222502     | -3208381    |              |             |             | -2093433    | -13437359  |             |              |            |           |              |              |               |               |              |
| Te2 |       | 6073  | 35344100 | 2148306   | 8917308    | 12762856    | 235997      | -6085068     | -1968591    | 26627853    | 280189      |            |             |              |            |           | -30419886    | 506133807    |               |               |              |
| Te3 |       |       | 43897    |           | 5266997    | 4369172     |             |              |             |             |             | 1358546    | 429106449   | -47881948    | 48233590   | -14456782 |              |              |               |               |              |
| P4  |       |       |          |           |            |             |             |              |             |             |             | 5172500    | 18571555    | 20264192     |            | 37933373  |              |              |               |               |              |
| Si5 |       |       |          |           | 3430227374 | 43452506571 | -1076875    | -892397      | -886886     | -986484     | -15413678   |            |             |              |            |           | 174752289    | 122365025    | 123410683     | 83475725      | 153080245    |
| F6  |       |       |          |           |            | 19045       | -4248854868 | -19374796618 | -3104934142 | -9314804826 | 31475138    | 6458214907 | -706064548  | 40757714     | -447656440 | 135561330 | 33480679     | 22656775     |               |               |              |
| F7  |       |       |          |           |            |             | 93858743    | 481995456    | 85568847    | 1150606577  | -3363933496 | 15424348   | -6458610641 | -17300007002 | 1086098174 | 139635673 | 19056112     | 17452226     |               |               |              |
| C9  |       |       |          |           |            |             |             | 94           | 101         | 148         | 372         | -16602     | 101943      | -530772      | -5187222   | 1764871   | 4251611      | 3876607      | 2782280537    | 2247229530    | 65193523     |
| C10 |       |       |          |           |            |             |             |              | 54          | 19          | 9612        | 345217     | -3211785    | -2618701     | 2823836    | 1547468   | -2111857336  | 318121277    | 4663044       | 4490587       | 4686106      |
| C11 |       |       |          |           |            |             |             |              |             | 37          | -14558      | 257725     | -787177     | -458924      | -909740    | 1299368   | 162903435    | -1954848632  | 99442378      | 2616179011    | 5535276055   |
| C12 |       |       |          |           |            |             |             |              |             |             | -31954      | -1244300   | -870079     | -574768      | -797597    | -1317188  | 384114253    | 128288462    | 6741684838    | 97905810      | -6260135118  |
| C13 |       |       |          |           |            |             |             |              |             |             |             | -227970    | -1770890    | 132498       | -6637658   | 570822    | 225204911    | 525855461    | -9560954034   | -7303516116   | 3459555292   |
| C14 |       |       |          |           |            |             |             |              |             |             |             |            | 20925       | 6372         | -57821     | 11408     | 18132713078  | 8481462480   | 18132678775   | 6829199649    | 14212097758  |
| C15 |       |       |          |           |            |             |             |              |             |             |             |            |             | 166          | 265846     | 96        | -16432588791 | -43820402982 | -47803804229  | -105168507000 | -35056118605 |
| C16 |       |       |          |           |            |             |             |              |             |             |             |            |             |              | 17         | 53965     | -43820603271 | 35056615582  | -131461561119 |               | -47804197912 |
| C17 |       |       |          |           |            |             |             |              |             |             |             |            |             |              |            | 136       | 105169365797 | 12229042406  | 65730729276   | 27676132773   | 525845766763 |
| C18 |       |       |          |           |            |             |             |              |             |             |             |            |             |              |            |           | 52584319185  | 6114478911   | 27675905109   | 13146072139   | 47803829966  |
| H19 |       |       |          |           |            |             |             |              |             |             |             |            |             |              |            |           |              | -259         | 3168          | 1035          | -4763        |
| H20 |       |       |          |           |            |             |             |              |             |             |             |            |             |              |            |           |              |              | 8258          | 3953          | 4899         |
| H21 |       |       |          |           |            |             |             |              |             |             |             |            |             |              |            |           |              |              |               | -59           | -6           |
| H22 |       |       |          |           |            |             |             |              |             |             |             |            |             |              |            |           |              |              |               |               | -66          |
| H23 |       |       |          |           |            |             |             |              |             |             |             |            |             |              |            |           |              |              |               |               |              |
| H24 |       |       |          |           |            |             |             |              |             |             |             |            |             |              |            |           |              |              |               |               |              |
| H25 |       |       |          |           |            |             |             |              |             |             |             |            |             |              |            |           |              |              |               |               |              |
| H26 |       |       |          |           |            |             |             |              |             |             |             |            |             |              |            |           |              |              |               |               |              |
| H27 |       |       |          |           |            |             |             |              |             |             |             |            |             |              |            |           |              |              |               |               |              |
| H28 |       |       |          |           |            |             |             |              |             |             |             |            |             |              |            |           |              |              |               |               |              |
| H29 |       |       |          |           |            |             |             |              |             |             |             |            |             |              |            |           |              |              |               |               |              |
| H30 |       |       |          |           |            |             |             |              |             |             |             |            |             |              |            |           |              |              |               |               |              |
| H31 |       |       |          |           |            |             |             |              |             |             |             |            |             |              |            |           |              |              |               |               |              |
| H32 |       |       |          |           |            |             |             |              |             |             |             |            |             |              |            |           |              |              |               |               |              |
| H33 |       |       |          |           |            |             |             |              |             |             |             |            |             |              |            |           |              |              |               |               |              |
| H34 |       |       |          |           |            |             |             |              |             |             |             |            |             |              |            |           |              |              |               |               |              |
| H35 |       |       |          |           |            |             |             |              |             |             |             |            |             |              |            |           |              |              |               |               |              |
| H36 |       |       |          |           |            |             |             |              |             |             |             |            |             |              |            |           |              |              |               |               |              |
| H37 |       |       |          |           |            |             |             |              |             |             |             |            |             |              |            |           |              |              |               |               |              |
| H38 |       |       |          |           |            |             |             |              |             |             |             |            |             |              |            |           |              |              |               |               |              |
| H39 |       |       |          |           |            |             |             |              |             |             |             |            |             |              |            |           |              |              |               |               |              |
| H40 |       |       |          |           |            |             |             |              |             |             |             |            |             |              |            |           |              |              |               |               |              |
| H41 |       |       |          |           |            |             |             |              |             |             |             |            |             |              |            |           |              |              |               |               |              |
| H42 |       |       |          |           |            |             |             |              |             |             |             |            |             |              |            |           |              |              |               |               |              |
| H43 |       |       |          |           |            |             |             |              |             |             |             |            |             |              |            |           |              |              |               |               |              |
| H44 |       |       |          |           |            |             |             |              |             |             |             |            |             |              |            |           |              |              |               |               |              |



cont. **Table S7:** For molecule 1: ratio analysis,  $\Delta\omega_0/J \geq 10$  (Data from **Table S3**).

|     | H24          | H25          | H26          | H27           | H28          | H29          | H30          | H31           | H32          | H33          | H34          | H35          | H36          | H37           | H38           | H39           | H40          | H41          | H42           | H43          | H44           |
|-----|--------------|--------------|--------------|---------------|--------------|--------------|--------------|---------------|--------------|--------------|--------------|--------------|--------------|---------------|---------------|---------------|--------------|--------------|---------------|--------------|---------------|
| Hg  |              |              |              |               |              |              |              |               |              |              |              |              |              |               |               |               |              |              |               |              |               |
| Te2 |              |              |              |               |              |              | -28254202    | -5319433      | 548988726    |              |              |              |              |               |               |               |              |              |               |              |               |
| Te3 |              |              |              |               |              |              |              |               |              | 135650885    | -339172185   | 23583751     | -8715595     | 206066638     | 146454026     | -1889482263   | 2473866615   | 377006256    | 10907468584   | -266184495   | -210865293    |
| P4  |              |              |              |               |              |              |              |               |              | -22140325    | 3799644285   | -38600070    | 989934       | 45233921      | 18936303      | 1034556247    | -1177358739  | 200557194    | -1077218677   | 26801082     | 1222110046    |
| S15 | 81399473     | 131882862    | 150380982    | 143407931     | 122577599    | 121231130    | 1737275068   | -656799487    | 1489101625   |              |              |              |              |               |               |               |              |              |               |              |               |
| F6  |              |              |              |               |              |              | 78714537     | -166596784    | -6552812     |              |              |              |              |               |               |               |              |              |               |              |               |
| F7  |              |              |              |               |              |              | 35978336     | -57405930     | 50921788     | -387728412   | -108593592   | -307284700   | -68123216    | 45636206      | 46663614      | 16566535      | -69604418    | 75423770     | 25496452      | 13339149     | 13556705      |
| C9  | 1506739964   | 91261879     | 4140558344   | 77719631      | 2078463352   | 2368698345   | 365682904    | 153220295     | 873513801    | 15935042275  | -87642034549 | 65731611181  | -4310299126  | -20225106377  | -8481506579   | -105170411953 | -87642281371 | 11951193826  | 27676430669   | 6044301251   | 13838236096   |
| C10 | 4014142808   | 1976884996   | 98881416     | -5654317009   | 101222654    | 2379418521   | 23902385303  | 1460701429    | -13483481249 | 7406434585   | 17528422258  | 17528444997  | -13838340891 | -47804838750  | -16963028012  | -75121788602  | -37561010620 | 40450229908  | 65731580395   | 11188397218  | 16963013939   |
| C11 | 4404051      | 4700010      | 4751481      | 4310256497    | 7303493044   | 104273509    | -10310829165 | -2767643818   | -3529232077  | 5155457513   | 8764207975   | 18780470024  | -10310916954 | -15466265795  | -7848562375   | -15024352314  | -8481515475  | -22863165199 | -32865778370  | 525854480015 | 262926621431  |
| C12 | 90617378     | -5842792715  | 2812039068   | 4694138       | 4708472      | 4686608      | -30932494833 | -9066421553   | -15024448692 | -35057119402 | -35056840217 | -29214071412 | -9561034352  | -16432911305  | -10112573151  | -19476016879  | -12229164748 | -23902405650 | -26292628933  | -16432956399 | -25040636553  |
| C13 | -2540356028  | -2797087228  | 9738006670   | -25040593898  | -4572631986  | -14607013420 | 3976538      | 4060927       | 3479983      | -5206513322  | -5477642268  | -8764238998  | -3626606509  | -105170843248 | -105170971670 | 13146337755   | 5778627897   | 12229162297  | 5155428       | 30932685837  | -262927211041 |
| C14 | 4533180262   | 13146190286  | 21033902911  | -175282561496 | -26292394552 | -43820641311 | -7512123990  | -6044238129   | -6829246381  | 3915860      | 4259817      | 4315973      | 171511140    | -2782272110   | -1947592855   | 771039183     | -9560915478  | 19475895978  | -175282948589 | 4653547539   | 1669363920    |
| C15 | -9737834675  | -13837941407 | -8089872843  | -16432557704  | -11950955751 | -17528061925 | -29213491183 | -37560205660  | 32865383334  | -2358059283  | 638159020    | -2873462921  | -1741216286  | 4047255       | 4099670       | 237400851     | -132956893   | 62914974     | 830715652     | -11431413780 | 123815351     |
| C16 | -10955155633 | -15466063865 | -8912646318  | -19475786832  | -14212066244 | -22862880683 | 58427471028  | 37560519799   | 8912720870   | -40450124470 | 2577683482   | 7512115893   | 10731667683  | -287820465    | -288610665    | 4331598       | 4055192      | -372941668   | -193113260    | 3838317021   | 87219803      |
| C17 | -27676161059 | -27676092692 | -12520136250 | -26292291710  | -18132622095 | -35056389696 | 131461707246 | -175282288974 | 12825612708  | 4737398269   | -18780250717 | 9921654759   | 1355286872   | 6573094732    | 78979907      | -428214066    | -143049103   | 4172332      | 4506011       | -183734808   | -402024300    |
| C18 | 58427046998  | -47803829455 | -13483130394 | -26292109854  | -15934618291 | -32865138020 | -52584319185 | -18780115350  | 18132637376  | 2286293786   | 1037166436   | 2401114452   | 164945944    | 1898353579    | 160907155     | 66562435      | 718367300    | 221314690    | -149642390    | 3707131      | 4062549       |
| H19 | -1384        | 771          | -3652        | 2842          | 3153         | 2535         | 0            | -83           | 32595        | 1459619      | -1873        | -17465       | -28159       | -7649         | -7248         | -1361         | -42872       | 6025         | 11893         | 19403        | 23886         |
| H20 | 3636         | -18014       | 13424        | 1603          | -79506       | -229078      | 19364        | -2480         | 1833         | 5704         | 34026        | 9190         | -13206       | -31920        | -3815         | 41509         | 3014         | 5594         | 13744         | 360          | 3981          |
| H21 | -8455        | -474         | 46           | 0             | -712         | 95           | 99478        | -5706         | 4286827      | 32371        | 20446        | 26686        | -41771       | -47145        | -25121        | -57685        | -91959       | 62788        | 48387         | 22135        | 23217         |
| H22 | 1265         | 8189         | -6506        | -2541         | 225          | -3721        | -3690        | -1275         | -97253       | 12801        | 2703         | 6740         | -37964       | -43996        | -17152        | -38873        | -94206       | 9629         | 8596          | 8989         | 7466          |
| H23 | 6532         | 28           | -287         | 531           | -892         | 2186         | -11935       | 12793         | -30664       | 27903        | 11936        | 22247        | -49905       | -36236        | -21526        | -27644        | -39061       | 131197       | 307180        | 34261        | 31041         |
| H24 |              | -113         | -127         | -15921        | -6841        | 528          | -590         | -356          | -6941        | 7420         | 108          | 3117         | -18956       | -3389         | -3616         | -1259         | -5183        | -4323        | -1267         | 19813        | 8833          |
| H25 |              |              | -3           | 385           | 2151         | -283         | -5680        | -2764         | -12077       | 23177        | 7277         | 24571        | -37467       | -16674        | -11825        | -10485        | -14972       | -21351       | -21655        | -98801       | -674427       |
| H26 |              |              |              | 677           | 961          | -804         | -2153        | -1855         | -7060        | 29491        | 9403         | 89987        | -22070       | -10198        | -7931         | -6534         | -9110        | -10443       | -10434        | -17642       | -25456        |
| H27 |              |              |              |               | -17          | -1           | -10471       | -6111         | -21761       |              | -118587      | -62267       | -33778       | -17983        | -14823        | -12361        | -19754       | -22832       | -19355        | -36636       | -37504        |
| H28 |              |              |              |               | -17          | -17          | -14076       | -2940         | -14469       | -75987       | -15302       | -21301       | -24043       | -11739        | -10430        | -7427         | -13668       | -13546       | -10849        | -19108       | -18163        |
| H29 |              |              |              |               |              |              | 19671        | -6009         | -38869       | -178747      | -23493       | -37136       | -30338       | -19257        | -15835        | -14673        | -24141       | -37392       | -23001        | -52936       | -48474        |
| H30 |              |              |              |               |              |              |              | -4            | -548         | -16587       | -727         | -5107        | -25295       | -12493        | -17182        | 1210          | 17061        | 6170         | 18500         | -182716      | -19499        |
| H31 |              |              |              |               |              |              |              |               | -362         | -10880       | -463         | -3510        | -13252       | -15142        | 61            | 14            | 11116        | 10777        | -9183         | -17376       | -7521         |
| H32 |              |              |              |               |              |              |              |               |              | -3748        | -9397        | -14228       | -5153        | 63561         | 23754         | 18047         | 4050         | 11120        | 26046         | 4072         | 46732         |
| H33 |              |              |              |               |              |              |              |               |              |              |              | -323         |              | 10340         | -30481        | 255018        | 71233        | 19728        | 26661         | 3101         | 4056          |
| H34 |              |              |              |               |              |              |              |               |              |              |              | -65          | 3084         | -4616         | -3298         | 358           | -9198        | -10033       | -3074         | 9811         | 1502          |
| H35 |              |              |              |               |              |              |              |               |              |              |              | 3651         | 966          | -27288        | 9877          | 99847         | 3611         | 5939         | 3950          | 544          |               |
| H36 |              |              |              |               |              |              |              |               |              |              |              |              |              | 5974          | 2999          | -492628       | -57249       | 8278         | 100249        | -2166        | -11858        |
| H37 |              |              |              |               |              |              |              |               |              |              |              |              |              |               | -83           | 121           | 79           | -551         | -5831         | 6529         | -447          |
| H38 |              |              |              |               |              |              |              |               |              |              |              |              |              |               |               | 2918          | 30           | 1136         | -4284         | -5339        | 2851          |
| H39 |              |              |              |               |              |              |              |               |              |              |              |              |              |               |               |               | -160         | 809          | 21            | -6822        | 1194          |
| H40 |              |              |              |               |              |              |              |               |              |              |              |              |              |               |               |               |              | 177          | 117           | 1582         | -3981         |
| H41 |              |              |              |               |              |              |              |               |              |              |              |              |              |               |               |               |              |              | -36           | 252          | 1173          |
| H42 |              |              |              |               |              |              |              |               |              |              |              |              |              |               |               |               |              |              |               | 176          | 99            |
| H43 |              |              |              |               |              |              |              |               |              |              |              |              |              |               |               |               |              |              |               |              | -161          |
| H44 |              |              |              |               |              |              |              |               |              |              |              |              |              |               |               |               |              |              |               |              |               |



**Table S8:** For molecule 2: ratio analysis,  $\Delta\omega_0/J \geq 10$  (Data from **Table S4**).

|     | Se2    | Se3   | P4         | Si5        | F6         | F7          | C9           | C10         | C11          | C12         | C13         | C14         | C15         | C16          | C17        | C18       | H19           | H20          | H21          | H22          | H23          |
|-----|--------|-------|------------|------------|------------|-------------|--------------|-------------|--------------|-------------|-------------|-------------|-------------|--------------|------------|-----------|---------------|--------------|--------------|--------------|--------------|
| Hg  | -10103 | -5658 | -832154    | -113404384 | -215435    | -229604     | -2339061     |             |              |             | -1778445    | -7706960    |             |              |            |           |               |              |              |              |              |
| Se2 |        | 5946  | -904910966 | -299058    | -82214945  | -81108452   | -504812      | -68575545   | 10638922     | 5211978     | -609930     |             |             |              |            |           | 104962780     | 685362002    |              |              |              |
| Se3 |        |       | -247240    |            | -24348332  | -16459986   |              |             |              |             |             | -4236567    | -3850394951 | 113845341    | -181762948 | 78872322  |               |              |              |              |              |
| P4  |        |       |            |            |            |             |              |             |              |             |             | 3807363     | 20411473    | 20228520     |            | 35585408  |               |              |              |              |              |
| Si5 |        |       |            |            | 3571114972 | -1123776156 | -1076259     | -991961     | -881397      | -884003     | -11777281   |             |             |              |            |           | 162119061     | 136059693    | 118875720    | 121861077    | 147195694    |
| F6  |        |       |            |            |            | -184834     | -10305406588 | -7338754927 | -15624449788 | -2971522072 | 29296257    | 48435438367 | -564509049  | 35146408     | -474390149 | 388722851 | 29491537      | 23027838     |              |              |              |
| F7  |        |       |            |            |            |             | 107621298    | 1614690586  | 187827567    | 84568339    | -1827941004 | 17776284    | -6727751599 | -10306425381 | 1066964081 | 100832228 | 23323153      | 16951662     |              |              |              |
| C9  |        |       |            |            |            |             |              | 916         | 756          | 786         | 408         | -425        | 82234       | -112877      | -353518    | 5437413   | 4278184       | 3860160      | 2753130146   | 2128937806   | 77811136     |
| C10 |        |       |            |            |            |             |              |             | 36           | 78          | 561940      | -688308     | -823706     | -575887      | -783311    | -1144125  | 299289936     | 145544973    | 4700055      | 4692336      | 4695521      |
| C11 |        |       |            |            |            |             |              |             |              | 48          | 19012       | 323613      | -1835794    | -1767062     | 2800690    | 1545200   | -1878044772   | 313755434    | 101496177    | 2247228512   | -4456368572  |
| C12 |        |       |            |            |            |             |              |             |              |             | -20686      | 337636      | -717940     | -454620      | -822233    | 942545    | 212551613     | -2642483725  | 7848535015   | 102926527    | 4780469507   |
| C13 |        |       |            |            |            |             |              |             |              |             |             | -24301      | -568279     | 50495        | -445579    | 6343295   | 167201783     | 483319098    | -6573109548  | -15934804362 | 13483296503  |
| C14 |        |       |            |            |            |             |              |             |              |             |             |             | 18920       | 8795         | -49796     | 11377     | 37560641175   | 16962920881  | -23902187819 | -32865494507 | -87641321965 |
| C15 |        |       |            |            |            |             |              |             |              |             |             |             |             | 147          | 143104     | 25        | -12825447737  | -17528164269 | -12228895646 | -16962654609 | -15934615532 |
| C16 |        |       |            |            |            |             |              |             |              |             |             |             |             |              | 13         | 47262     | -29213735278  | 175282935286 | -15024182588 | -22862876986 | -19475784828 |
| C17 |        |       |            |            |            |             |              |             |              |             |             |             |             |              |            | 137       | -75120990687  | 20224942526  | -18780217513 | -32865366905 | -26292294508 |
| C18 |        |       |            |            |            |             |              |             |              |             |             |             |             |              |            |           | -105168652998 | 8912624336   | -15465953546 | -29213455592 | -23901919106 |
| H19 |        |       |            |            |            |             |              |             |              |             |             |             |             |              |            |           |               | -186         | 4691         | 3433         | 2176         |
| H20 |        |       |            |            |            |             |              |             |              |             |             |             |             |              |            |           |               |              | -61931       | -97599       | 1623         |
| H21 |        |       |            |            |            |             |              |             |              |             |             |             |             |              |            |           |               |              |              | -19          | -17          |
| H22 |        |       |            |            |            |             |              |             |              |             |             |             |             |              |            |           |               |              |              |              | -2           |
| H23 |        |       |            |            |            |             |              |             |              |             |             |             |             |              |            |           |               |              |              |              |              |
| H24 |        |       |            |            |            |             |              |             |              |             |             |             |             |              |            |           |               |              |              |              |              |
| H25 |        |       |            |            |            |             |              |             |              |             |             |             |             |              |            |           |               |              |              |              |              |
| H26 |        |       |            |            |            |             |              |             |              |             |             |             |             |              |            |           |               |              |              |              |              |
| H27 |        |       |            |            |            |             |              |             |              |             |             |             |             |              |            |           |               |              |              |              |              |
| H28 |        |       |            |            |            |             |              |             |              |             |             |             |             |              |            |           |               |              |              |              |              |
| H29 |        |       |            |            |            |             |              |             |              |             |             |             |             |              |            |           |               |              |              |              |              |
| H30 |        |       |            |            |            |             |              |             |              |             |             |             |             |              |            |           |               |              |              |              |              |
| H31 |        |       |            |            |            |             |              |             |              |             |             |             |             |              |            |           |               |              |              |              |              |
| H32 |        |       |            |            |            |             |              |             |              |             |             |             |             |              |            |           |               |              |              |              |              |
| H33 |        |       |            |            |            |             |              |             |              |             |             |             |             |              |            |           |               |              |              |              |              |
| H34 |        |       |            |            |            |             |              |             |              |             |             |             |             |              |            |           |               |              |              |              |              |
| H35 |        |       |            |            |            |             |              |             |              |             |             |             |             |              |            |           |               |              |              |              |              |
| H36 |        |       |            |            |            |             |              |             |              |             |             |             |             |              |            |           |               |              |              |              |              |
| H37 |        |       |            |            |            |             |              |             |              |             |             |             |             |              |            |           |               |              |              |              |              |
| H38 |        |       |            |            |            |             |              |             |              |             |             |             |             |              |            |           |               |              |              |              |              |
| H39 |        |       |            |            |            |             |              |             |              |             |             |             |             |              |            |           |               |              |              |              |              |
| H40 |        |       |            |            |            |             |              |             |              |             |             |             |             |              |            |           |               |              |              |              |              |
| H41 |        |       |            |            |            |             |              |             |              |             |             |             |             |              |            |           |               |              |              |              |              |
| H42 |        |       |            |            |            |             |              |             |              |             |             |             |             |              |            |           |               |              |              |              |              |
| H43 |        |       |            |            |            |             |              |             |              |             |             |             |             |              |            |           |               |              |              |              |              |
| H44 |        |       |            |            |            |             |              |             |              |             |             |             |             |              |            |           |               |              |              |              |              |



cont. **Table S8:** For molecule 2: ratio analysis,  $\Delta\omega_0/J \geq 10$  (Data from **Table S4**).

|     | H24          | H25          | H26           | H27          | H28          | H29          | H30           | H31          | H32           | H33          | H34          | H35          | H36          | H37          | H38          | H39          | H40          | H41          | H42          | H43           | H44           |
|-----|--------------|--------------|---------------|--------------|--------------|--------------|---------------|--------------|---------------|--------------|--------------|--------------|--------------|--------------|--------------|--------------|--------------|--------------|--------------|---------------|---------------|
| Hg  |              |              |               |              |              |              |               |              |               |              |              |              |              |              |              |              |              |              |              |               |               |
| Se2 |              |              |               |              |              |              | 79663995      | 15065460     | 565339762     |              |              |              |              |              |              |              |              |              |              |               |               |
| P4  |              |              |               |              |              |              |               |              | -479495063    | 914972221    | -133254709   | 16448660     | 1706301829   | -1186219644  | 6764258312   | -4984205827  | -1544016679  | -7192377607  | 279488393    | 323023689     |               |
| S15 | 123140733    | 154128218    | 79111337      | 132099564    | 82064068     | 139429363    | 1876258212    | -456881134   | 1299954527    | -20488860    | -178686771   | -57135842    | 932758       | 57823619     | 22407775     | 954219875    | -1379373172  | 181558968    | -1007104670  | 32162409      | -1865844985   |
| F6  |              |              |               |              |              |              | 48588616      | -187759146   | -7126485      | -128877454   | -85379919    | -233117813   | -261002468   | 37349595     | 43405963     | 18001991     | -24111770    | 73312772     | 20623619     | 13731567      | 21411538      |
| F7  |              |              |               |              |              |              | 25774457      | -54461788    | 55338016      | -1734203     | -50115224    | -78199283    | 21158776     | -436274203   | -102085590   | 986791395    | -1151305688  | 87438140     | 22910653     | -238203700    | -238196610    |
| C9  | 2007051960   | 65249730     | 2347537887    | 104917710    | 2970896973   | 4572588353   | 309687154     | 110518890    | 554695817     | 131463162477 | -21033950007 | -40449929259 | -3783118720  | -14212148908 | -6829223507  | -40449899915 | -32865654065 | 18132728920  | 87641471945  | 9921715172    | 37560690749   |
| C10 | 7848527300   | -5311629196  | 97778394      | 16962944513  | 90213155     | 7967445093   | -52585250299  | -30932505672 | -21034213985  | -27676650815 | -29214025876 | -29214044219 | -9066503753  | -16432913287 | -10112575493 | -20225092864 | -12520337634 | -23902402466 | -25040597488 | -15024417706  | -21910557753  |
| C11 | 4672947      | 4686273      | 4449212       | 3093243518   | 2445826037   | 99198546     |               | 1358792544   | -11431640605  | 8216507558   | 23902390180  | 21034116566  | -11951303088 | -37560953100 | -14607056773 | -58428059187 | -32865893677 | 43821081038  | 87642110909  | 11431624737   | 20225134780   |
| C12 | 99536551     | 4240738410   | 2528136898    | 4714635      | 4413442      | 4708894      | -75121825064  | -3039611959  | -4653589576   | 5365884061   | 9738013671   | 22863176887  | -10955364377 | -14212256693 | -7406397156  | -14607019081 | -7848573927  | -21910546946 | -30932518806 | -87642482027  | -131463414631 |
| C13 | -8481427732  | 2590386605   | -6491967810   | -2358064889  | -3022124541  | 10955178467  | 3997155       | 4118530      | 3504329       | -4310275047  | -5155388785  | -7203424469  | -3206429317  | -29213911972 | -25040529329 | 21910400199  | 8620514278   | 29213891364  | 5155390      | -15466229706  | -17528352546  |
| C14 | 22862951632  | 16432745278  | 7106064335    | 15466112893  | 4737378723   | 27676207084  | -6656317234   | -5421125308  | -5311635435   | 3943611      | 4261406      | 4331365      | 118863873    | -3039594125  | -1919162351  | 806516830    | -8481463534  | 65731176590  | -58427678413 | 6335556364    | 1398537087    |
| C15 | -37560162022 | -29213457204 | -47803921959  | -13146055478 | -8620383919  | -7848392767  | -18780122937  | -21033741427 | -175282096291 | -2434478263  | 619367968    | -2889251292  | -2014743896  | 4061325      | 4074043      | 236866376    | -131395582   | 62869894     | 829406130    | -131461389736 | 135947344     |
| C16 | -75120878012 | -40449700573 | -131461754832 | -14606836025 | -9560859942  | -8764103219  | -262923660006 |              |               | 12520242063  | -26292559126 | 2655794357   | 7106048824   | 6492000428   | -278816565   | -292300580   | 4334739      | 4039958      | -390674347   | -186669281    | 6573117959    |
| C17 | 87640974315  |              | 32865419946   | -25040276034 | -21033879865 | -11951043022 | -52584701982  | -30932183133 | 25040469832   | 5258508823   | -17528232753 | 9066332979   | 1311350959   | 4140533402   | 76309453     | -426132035   | -147090545   | 4180725      | 4505394      | -200323481    | -361656054    |
| C18 | 32865136005  | 58426904159  | 13146076233   | -40449394377 | 525843326813 | -11685382736 | -17528111667  | -11188158371 | -262923098321 | 2337098722   | 970190614    | 2337082858   | 181514693    | 4108156814   | 150284302    | 65977825     | 696483480    | 219834323    | -150112302   | 3727656       | 4073375       |
| H19 | 4818         | -3970        | 852           | 1301         | -234         | -3708        | 223           | -536         | 19808         | -50609       | -332         | -3818        | -33331       | -6727        | -6916        | -72          | -29875       | 10907        | -6463        | 84682         | -46099        |
| H20 | 8036         | 4505         | 3517          | -14036       | 4745         | 27216        | 9005          | -1758        | 1814          | 9507         | -29290       | 47716        | -12712       | -8678        | -279         | 98398        | 2701         | 5562         | 18020        | 1520          | 3791          |
| H21 | -752         | -825         | 300           | 3496         | -5120        | 745          | 84495         | -5812        | -22344        | -60658       | -13317       | -14728       | -26498       | -13320       | -11939       | -8326        | -15800       | -15247       | -11592       | -19910        | -18495        |
| H22 | 251          | 3328         | -4375         | -277         | 493          | -99          | 17682         | -10714       | -66600        | -98271       | -17377       | -24446       | -32044       | -20124       | -16701       | -15833       | -26924       | -36600       | -23872       | -48030        | -38347        |
| H23 | 1526         | 761          | -2820         | 516          | -9377        | 22           | -17379        | -13295       | -27050        | -356583      | -57496       | -37437       | -35420       | -19290       | -15952       | -12854       | -21267       | -22784       | -19245       | -35675        | -34702        |
| H24 |              | -3           | -76           | -203         | -7723        | 21           | -293481       | -7921        | 446730        | 36233        | 35522        | 31210        | -37991       | -40343       | -23605       | -49337       | -83869       | 34663        | 81212        | 25119         | 31646         |
| H25 |              |              | -80           | 66           | 7528         | -431         | -12126        | 9969         | -29847        | 29000        | 13992        | 21204        | -44903       | -34549       | -21081       | -26141       | -38536       | 156383       | -628411      | 37833         | 40301         |
| H26 |              |              |               | 12465        | 725          | -4515        | -3165         | -1499        | -61712        | 12281        | 1756         | 4011         | -30581       | -26918       | -13898       | -12480       | -61822       | 8252         | 7665         | 9020          | 7998          |
| H27 |              |              |               |              | -104         | -8           | -11875        | -4220        | -13171        | 24333        | 7700         | 24064        | -38063       | -17369       | -12659       | -10704       | -15267       | -20715       | -20776       | -72605        | -123893       |
| H28 |              |              |               |              |              | -104         | -75           | -259         | -6643         | 7501         | 41           | 1776         | -19417       | -4411        | -4203        | -401         | -5434        | -4566        | -992         | 34515         | 19282         |
| H29 |              |              |               |              |              |              | -3139         | -2892        | -8227         | 33262        | 9005         | 473270       | -22998       | -10104       | -8119        | -6002        | -8960        | -9536        | -9369        | -15669        | -20302        |
| H30 |              |              |               |              |              |              |               | -10          | -462          | -12623       | -137         | -1480        | -28063       | -8301        | -12590       | 44259        | 39944        | 19515        | -1383        | -18568        | -8743         |
| H31 |              |              |               |              |              |              |               |              | -281          | -8357        | -385         | -753         | -13091       | -8613        | 71           | 415          | 18860        | -15166       | -946         | -8395         | -4618         |
| H32 |              |              |               |              |              |              |               |              |               | -2540        | -7629        | -10867       | -6441        | -124967      | 94935        | 23671        | 3542         | 15404        | 51896        | 8488          | -49089        |
| H33 |              |              |               |              |              |              |               |              |               |              |              | -326         | 73           | 9318         | -18073       | -493877      | -312123      | 20654        | 28709        | 2754          | 3781          |
| H34 |              |              |               |              |              |              |               |              |               |              |              |              |              |              |              |              |              |              |              |               |               |
| H35 |              |              |               |              |              |              |               |              |               |              |              | -31          | 3528         | -4494        | -3772        | 123          | -9422        | -7471        | -3018        | 11218         | 2125          |
| H36 |              |              |               |              |              |              |               |              |               |              |              |              | 8603         | 3066         | -24558       | 4541         | -81452       | 678          | 2438         | 4916          | 4647          |
| H37 |              |              |               |              |              |              |               |              |               |              |              |              |              | 5260         | 3250         | -177896      | -34512       | 9284         | 1167602      | -3593         | -30170        |
| H38 |              |              |               |              |              |              |               |              |               |              |              |              |              |              | -94          | 142          | 82           | -839         | -5603        | 3874          | -397          |
| H39 |              |              |               |              |              |              |               |              |               |              |              |              |              |              |              | 3740         | 28           | 1423         | -4376        | -3752         | 3014          |
| H40 |              |              |               |              |              |              |               |              |               |              |              |              |              |              |              |              | -171         | 797          | 23           | -6092         | 1404          |
| H41 |              |              |               |              |              |              |               |              |               |              |              |              |              |              |              |              |              | 203          | 126          | 1608          | -3645         |
| H42 |              |              |               |              |              |              |               |              |               |              |              |              |              |              |              |              |              |              | -32          | 263           | 1449          |
| H43 |              |              |               |              |              |              |               |              |               |              |              |              |              |              |              |              |              |              |              | 180           | 101           |
| H44 |              |              |               |              |              |              |               |              |               |              |              |              |              |              |              |              |              |              |              |               | -160          |



**Table S9:** For molecule 3: ratio analysis,  $\Delta\omega_0/J \geq 10$  (Data from **Table S5**).

|     | Te2     | Te3    | P4       | Si5         | F6         | F7        | C9          | C10          | C11          | C12         | C13         | C14         | C15          | C16          | C17        | C18         | H19          | H20           | H21          | H22          | H23          |               |
|-----|---------|--------|----------|-------------|------------|-----------|-------------|--------------|--------------|-------------|-------------|-------------|--------------|--------------|------------|-------------|--------------|---------------|--------------|--------------|--------------|---------------|
| Hg  | -138723 | -75863 | 2125154  | -8145210711 | 644468     | 643749    | 3197723     |              |              |             | 2333989     | 8013082     |              |              |            |             |              |               |              |              |              |               |
| Te2 |         | 3134   | 37941619 | 1972645     | 29629757   | 40399903  | 235308      | 45642766     | -6132736     | -2412452    | 280987      |             |              |              |            |             | -39509638    | 139896789     |              |              |              |               |
| Te3 |         |        | 41204    |             | 14566665   | 5015479   |             |              |              |             |             | 1370514     | 203027633    | -45121624    | 62263804   | -14763450   |              |               |              |              |              |               |
| P4  |         |        |          |             |            |           |             |              |              |             |             | 4801596     | 15855527     | 23241158     |            | 36706896    |              |               |              |              |              |               |
| Si5 |         |        |          |             | 4137898307 | 771319382 | -1097314    | -961055      | -917568      | -894727     | -15050098   |             |              |              |            |             | 146735431    | 139672095     | 123899710    | 118400529    | 140158396    |               |
| F6  |         |        |          |             |            | -4032     | -2162280035 | -15624210877 | -13454178207 | -3535405151 | 39821750    | 24217345426 | -684097255   | 33607085     | -580053934 | -2018089232 | 54751881     | 38643721      |              |              |              |               |
| F7  |         |        |          |             |            |           | 642423665   | 922642386    | 6545772041   | 61878797    | -2484044412 | 22814923    | -60547196544 | -15625226422 | 1537719844 | 53245920    | 66132711     | 22021583      |              |              |              |               |
| C9  |         |        |          |             |            |           |             | 50           | 66           | 47          | 411         | -16751      | 308471       | -678042      | -5692551   | 2328048     | 4243519      | 3953047       | 1891553677   | 2434498400   | 77570683     |               |
| C10 |         |        |          |             |            |           |             |              | 35           | 10          | -23458      | -1814326    | -968041      | -654211      | -785986    | -1824309    | 475884582    | 125562057     | 4675775      | 4685564      | 4701693      |               |
| C11 |         |        |          |             |            |           |             |              |              | 25          | 12960       | 500988      | -3186224     | -2555976     | 2690083    | 1799961     | -2368704239  | 375878322     | 98216588     | 2062162126   | -6919096653  |               |
| C12 |         |        |          |             |            |           |             |              |              |             | -15813      | 276708      | -1206120     | -650280      | -1823485   | 363604      | 145383586    | -1515428998   | 11685593335  | 107558076    | 4780467599   |               |
| C13 |         |        |          |             |            |           |             |              |              |             |             | -251808     | -1847985     | 118593       | -2303135   | -1504150    | 210678634    | 656498504     | -4076380923  | -15024367753 | -10731691324 |               |
| C14 |         |        |          |             |            |           |             |              |              |             |             |             | 25007        |              | 9278       | -56765      | 9862         | -175282944734 | 15934856523  | -30932241345 | -37560559658 | -175282612907 |
| C15 |         |        |          |             |            |           |             |              |              |             |             |             |              | 169          | 48029      | 148         | -18132509739 | -47804019408  | -13146051278 | -18780063695 | -18780063820 |               |
| C16 |         |        |          |             |            |           |             |              |              |             |             |             |              |              |            | 11          | 25578        | -47804293560  | 40449896940  | -15024185652 | -23902101371 | -21910259737  |
| C17 |         |        |          |             |            |           |             |              |              |             |             |             |              |              |            |             | 135          |               | 16432762250  | -18780222486 | -32865372622 | -29213664748  |
| C18 |         |        |          |             |            |           |             |              |              |             |             |             |              |              |            |             |              | 262921670655  | 9225346883   | -17528086999 | -30931902489 | -29213463657  |
| H19 |         |        |          |             |            |           |             |              |              |             |             |             |              |              |            |             |              |               | -178         | 3339         | 2622         | 4114          |
| H20 |         |        |          |             |            |           |             |              |              |             |             |             |              |              |            |             |              |               |              | -12948       | -34226       | 1261          |
| H21 |         |        |          |             |            |           |             |              |              |             |             |             |              |              |            |             |              |               |              |              | -23          | -22           |
| H22 |         |        |          |             |            |           |             |              |              |             |             |             |              |              |            |             |              |               |              |              |              | 0             |
| H23 |         |        |          |             |            |           |             |              |              |             |             |             |              |              |            |             |              |               |              |              |              |               |
| H24 |         |        |          |             |            |           |             |              |              |             |             |             |              |              |            |             |              |               |              |              |              |               |
| H25 |         |        |          |             |            |           |             |              |              |             |             |             |              |              |            |             |              |               |              |              |              |               |
| H26 |         |        |          |             |            |           |             |              |              |             |             |             |              |              |            |             |              |               |              |              |              |               |
| H27 |         |        |          |             |            |           |             |              |              |             |             |             |              |              |            |             |              |               |              |              |              |               |
| H28 |         |        |          |             |            |           |             |              |              |             |             |             |              |              |            |             |              |               |              |              |              |               |
| H29 |         |        |          |             |            |           |             |              |              |             |             |             |              |              |            |             |              |               |              |              |              |               |
| H30 |         |        |          |             |            |           |             |              |              |             |             |             |              |              |            |             |              |               |              |              |              |               |
| H31 |         |        |          |             |            |           |             |              |              |             |             |             |              |              |            |             |              |               |              |              |              |               |
| H32 |         |        |          |             |            |           |             |              |              |             |             |             |              |              |            |             |              |               |              |              |              |               |
| H33 |         |        |          |             |            |           |             |              |              |             |             |             |              |              |            |             |              |               |              |              |              |               |
| H34 |         |        |          |             |            |           |             |              |              |             |             |             |              |              |            |             |              |               |              |              |              |               |
| H35 |         |        |          |             |            |           |             |              |              |             |             |             |              |              |            |             |              |               |              |              |              |               |
| H36 |         |        |          |             |            |           |             |              |              |             |             |             |              |              |            |             |              |               |              |              |              |               |
| H37 |         |        |          |             |            |           |             |              |              |             |             |             |              |              |            |             |              |               |              |              |              |               |
| H38 |         |        |          |             |            |           |             |              |              |             |             |             |              |              |            |             |              |               |              |              |              |               |
| H39 |         |        |          |             |            |           |             |              |              |             |             |             |              |              |            |             |              |               |              |              |              |               |
| H40 |         |        |          |             |            |           |             |              |              |             |             |             |              |              |            |             |              |               |              |              |              |               |
| H41 |         |        |          |             |            |           |             |              |              |             |             |             |              |              |            |             |              |               |              |              |              |               |
| H42 |         |        |          |             |            |           |             |              |              |             |             |             |              |              |            |             |              |               |              |              |              |               |
| H43 |         |        |          |             |            |           |             |              |              |             |             |             |              |              |            |             |              |               |              |              |              |               |
| H44 |         |        |          |             |            |           |             |              |              |             |             |             |              |              |            |             |              |               |              |              |              |               |



cont. **Table S9:** For molecule 3: ratio analysis,  $\Delta\omega_0/J \geq 10$  (Data from **Table S5**).

|     | H24           | H25          | H26           | H27          | H28           | H29          | H30           | H31          | H32          | H33          | H34          | H35          | H36          | H37           | H38           | H39           | H40           | H41          | H42           | H43          | H44          |
|-----|---------------|--------------|---------------|--------------|---------------|--------------|---------------|--------------|--------------|--------------|--------------|--------------|--------------|---------------|---------------|---------------|---------------|--------------|---------------|--------------|--------------|
| Hg  |               |              |               |              |               |              |               |              |              |              |              |              |              |               |               |               |               |              |               |              |              |
| Te2 |               |              |               |              |               |              | -38504623     | -5193966     | 121634292    |              |              |              |              |               |               |               |               |              |               |              |              |
| Te3 |               |              |               |              |               |              |               |              |              | 133656924    | -273014069   | 23073863     | -10577694    | 190535638     | 150128260     | -2095888855   | 4102225597    | 428152603    | -14116433105  | -563996192   | -213790422   |
| P4  |               |              |               |              |               |              |               |              |              | -23134181    | -7463606594  | -38711000    | 975526       | 39893339      | 19725484      | 1471696424    | -1085619822   | 282406963    | 21997998013   | 26975861     | 376543004    |
| S15 | 121335665     | 146735170    | 95939406      | 126262010    | 84137149      | 144364192    | 1700535259    | -682275317   | 1497020850   |              |              |              |              |               |               |               |               |              |               |              |              |
| F6  |               |              |               |              |               |              | 49702975      | -145111714   | -11287640    | -139279879   | -105335332   | -186949643   | -402973496   | 25368374      | 38358072      | 34613792      | -14572958     | 76856401     | 22543245      | 27323336     | 55783449     |
| F7  |               |              |               |              |               |              | 56415331      | -65196910    | 127593653    | -2620123     | -109696840   | -198402417   | 175718451    | 2764396282    | -165206049    | 499580971     | 1011391892    | 55067385     | 16415439      | 230374623    | 230367614    |
| C9  | 2480432495    | 66428961     | 3459552878    | 87788244     | 894307936     | -7512164656  | 353633296     | 141815717    | 862058001    | 16963101023  | -65731606101 | 525853548523 | -5842855533  | -23902426711  | -10517083237  | -262926332020 | -262927255493 | 13483414990  | 35056856119   | 9066463372   | 22863200603  |
| C10 | 7621036207    | -87641910760 | 97056450      | -2181955973  | 91739860      | 1493895839   | -26292626058  | -6919111677  | -27676588951 | -37561138648 | -37560904154 | -37560954134 | -10731771577 | -18132868862  | -11431608069  | -21034089936  | -13146358008  | -23902408817 | -27676455323  | -18132920171 | -25040639201 |
| C11 | 4660357       | 4679475      | 4556458       | 1231501798   | -14212236600  | 95958251     | 47804763584   | 1334650674   | -11431631920 | 13146395483  | 37560895459  | 30932543302  | -14212342853 | -52585307526  | -21034153978  | -105170470331 | -52585419860  | 37560919445  | 87642088232   | 15024416092  | 26292665074  |
| C12 | 100410820     | 25040544434  | 2577704977    | 4702575      | 4402542       | 4742355      | -13483397172  | -2873510688  | -3983751202  | 5056306823   | 9390225477   | 15934949286  | -11951290360 | -22863181111  | -10731713056  | -21910518414  | -12520340212  | -65731620314 | -175284206561 | 16963053339  | 40450260905  |
| C13 | -9225489575   | 3370851744   | -7512189346   | -2738816650  | -2842455586   | 8620536767   | 3960817       | 4079676      | 3505711      | -5778652182  | -6335591153  | -9066461472  | -4494514656  | -131463651124 | -131463844671 | 18780495746   | 7848592953    | 22863234846  | 5155432       | -18780574730 | -23902492305 |
| C14 | 37560562117   | 21910326496  | 11431483002   | 12825555140  | 4653533162    | 14606880740  | -8481433750   | -7203409025  | -7733111197  | 3930871      | 4248461      | 4314912      | 140527306    | -3783090420   | -2337112633   | 804050221     | -9921711164   | 47804487756  | 525849022480  | 2857886176   | 1912181071   |
| C15 | -52584181787  | -40449368012 | -131460541582 | -19475618851 | -15934642289  | -11188120317 | -27675938987  | -32865175439 | 75120787094  | -2316503351  | 617186594    | -3004821014  | -1163378599  | 4033563       | 4098105       | 255635777     | -140449957    | 64056927     | 944062784     | 3529161104   | 151409082    |
| C16 | -131461566148 | -58427358986 | 262923306523  | -21910256488 | -18780272938  | -12228979107 | 87641214579   | 87641208959  | 11431520791  | -30932394552 | 3286546403   | 7848479465   | 3601723107   | -304134160    | -300141973    | 4342471       | 4039524       | -374535442   | -183605942    | 26292472563  | 102047000    |
| C17 | 105169199276  | 525845962658 | 32865396552   | -4780471590  | -262923687019 | -19475771607 | -105169403852 | -47804271413 | 22863029920  | 5056254223   | -22862919837 | 9390140285   | 970205360    | 1976871034    | 71262836      | -428912701    | -157392642    | 4190354      | 4500228       | -210423843   | -352681369   |
| C18 | 404494113595  | 58426927002  | 15934628036   | 175280755949 | 15934659224   | -29213456320 | -22862756505  | -15024096169 | 525846068524 | 2256853303   | 959568497    | 2669260083   | 170122189    | 35056271697   | 131889854     | 64473192      | 692813174     | 218828078    | -154432755    | 3790588      | 4074417      |
| H19 | 3052          | -4212        | 2388          | 698          | -3656         | -2876        | 115           | -49          | 52446        | -96617       | -1759        | -13359       | -21089       | -8343         | -9197         | -390          | -53071        | 8430         | 94139         | 49380        | 960356       |
| H20 | 8465          | 5363         | 4292          | -10264       | 2367          | 11901        | 21790         | -1684        | 1800         | 8222         | 176535       | 8934         | -12139       | -21778        | -639          | 28990         | 4100          | 4054         | 12066         | 2185         | 2942         |
| H21 | -802          | -971         | 52            | 2759         | -5086         | 1371         | -9290         | -2470        | -11157       | -76537       | -18533       | -23570       | -25128       | -12315        | -11977        | -6933         | -15051        | -15029       | -10948        | -22041       | -19008       |
| H22 | 287           | 37           | -2026         | -199         | 634           | -1037        | 28576         | -5816        | -28229       | -95260       | -21327       | -34437       | -31066       | -20153        | -18169        | -15068        | -27205        | -34002       | -24230        | -47369       | -37680       |
| H23 | 997           | 23           | -1265         | 523          | -11546        | 1065         | -9941         | -5514        | -18897       | -1491233     | -132309      | -67518       | -35838       | -20112        | -17884        | -13065        | -23385        | -24622       | -21523        | -45318       | -39915       |
| H24 |               | -3           | -30           | -1027        | -5489         | 69           | 170480        | -5588        | -246119      | 49364        | 72492        | 61986        | -39917       | -48535        | -30911        | -65007        | -134384       | 34783        | 76857         | 33544        | 40956        |
| H25 |               |              | -33           | 447          | 9047          | -552         | -11611        | 9471         | -26802       | 35812        | 19567        | 35061        | -47703       | -41248        | -26953        | -32543        | -54919        | 89965        | 395523        | 41287        | 45550        |
| H26 |               |              |               | 9731         | 3196          | -3706        | -8326         | -2615        | -98333       | 17423        | 7728         | 13864        | -38454       | -79427        | -29506        | 626655        | 2473602       | 13657        | 17115         | 13325        | 13590        |
| H27 |               |              |               |              | -127          | -4           | -6542         | -2936        | -12027       | 19964        | 7736         | 22118        | -41999       | -22595        | -16136        | -14078        | -22204        | -43367       | -40701        | 73235        | 92446        |
| H28 |               |              |               |              |               | -140         | -985          | -814         | -6887        | 6522         | 694          | 2459         | -19657       | -3344         | -4978         | -4574         | -8701         | 19671        | -44962        | 7506         | 5067         |
| H29 |               |              |               |              |               |              | -2358         | -1949        | -6871        | 20025        | 7874         | 32622        | -26563       | -13893        | -10892        | -8622         | -13035        | -17278       | -17089        | -93046       | -83517       |
| H30 |               |              |               |              |               |              |               | -4           | -468         | -13902       | -578         | -4951        | -17638       | -11079        | -19079        | 2275          | 29986         | 14775        | -8665         | -21424       | -11276       |
| H31 |               |              |               |              |               |              |               |              | -290         | -10726       | -628         | -4125        | -14257       | -14782        | 70            | 49            | 19294         | -101305      | -5115         | -11566       | -7368        |
| H32 |               |              |               |              |               |              |               |              |              | -2877        | -9108        | -10652       | -5735        | 132872        | 20659         | 19267         | 2581          | 13556        | 37895         | 12952        | -110429      |
| H33 |               |              |               |              |               |              |               |              |              |              | -254         | -241         | 70           | 10434         | -14172        | 1155893       | 54024         | 16745        | 24924         | 2430         | 3856         |
| H34 |               |              |               |              |               |              |               |              |              |              |              | -66          | 3498         | -4854         | -3446         | 477           | -10135        | -9076        | -370          | 8516         | 1747         |
| H35 |               |              |               |              |               |              |               |              |              |              |              |              | 3047         | 2089          | -9435         | 11196         | -137495       | 4332         | 7599          | 3973         | 484          |
| H36 |               |              |               |              |               |              |               |              |              |              |              |              |              | 5172          | 3056          | -105705       | -27329        | 9101         | 134070        | -2023        | -11589       |
| H37 |               |              |               |              |               |              |               |              |              |              |              |              |              |               | -97           | 130           | 95            | -506         | -4626         | 7710         | -586         |
| H38 |               |              |               |              |               |              |               |              |              |              |              |              |              |               |               | 3508          | 39            | 1150         | -4357         | -3063        | 4315         |
| H39 |               |              |               |              |               |              |               |              |              |              |              |              |              |               |               |               | -167          | 1001         | 29            | -5108        | 1583         |
| H40 |               |              |               |              |               |              |               |              |              |              |              |              |              |               |               |               |               |              | 196           | 128          | 1673         |
| H41 |               |              |               |              |               |              |               |              |              |              |              |              |              |               |               |               |               |              |               | -34          | 237          |
| H42 |               |              |               |              |               |              |               |              |              |              |              |              |              |               |               |               |               |              |               |              | 181          |
| H43 |               |              |               |              |               |              |               |              |              |              |              |              |              |               |               |               |               |              |               |              | -151         |
| H44 |               |              |               |              |               |              |               |              |              |              |              |              |              |               |               |               |               |              |               |              |              |



Table S10: For molecule 4: ratio analysis,  $\Delta\omega_0/J \geq 10$  (Data from Table S6).

|     | Se2    | Se3   | P4         | Si5      | F6         | F7         | C9          | C10           | C11         | C12          | C13        | C14          | C15         | C16         | C17         | C18         | H19          | H20          | H21          | H22          | H23           |              |
|-----|--------|-------|------------|----------|------------|------------|-------------|---------------|-------------|--------------|------------|--------------|-------------|-------------|-------------|-------------|--------------|--------------|--------------|--------------|---------------|--------------|
| Hg  | 204682 | 92454 | 2529433    | 26184933 | 745010     | 730280     | 3069628     |               |             |              | 2161161    | 6036481      |             |             |             |             |              |              |              |              |               |              |
| Se2 |        | 6631  | 1615314506 | -350265  | -126025949 | 116090139  | -521383     | 9383735       | -160912963  | 5393862      | -612995    |              |             |             |             |             | 107061045    | 206009543    |              |              |               |              |
| Se3 |        |       | -227580    |          | -114027875 | -20210002  |             |               |             |              |            | -4599913     | 6051672030  | 94972899    | -176491881  | 264760536   |              |              |              |              |               |              |
| P4  |        |       |            |          |            |            |             |               |             |              |            | 3626910      | 15956057    | 21935078    |             | 28680191    |              |              |              |              |               |              |
| Si5 |        |       |            |          | 4533627271 | 1018370424 | -1125863    | -949465       | -879700     | -941727      | -10993971  |              |             |             |             |             | 147581976    | 143116963    | 117879879    | 117265948    | 142572561     |              |
| F6  |        |       |            |          |            | -5331      | 142957093   | -484341796417 | -4363444434 | 2295460667   | 109653485  | -10305079944 | -587070365  | 39974979    | -1337946696 | -2446126614 | 152053194    | 114991351    |              |              |               |              |
| F7  |        |       |            |          |            |            | -1567563597 | 790179963     | 50837621    | -80730120260 | 8969962276 | 24938335     | 21059633569 | -9885211496 | 3008541770  | 48543956    | -360626096   | -2764890458  |              |              |               |              |
| C9  |        |       |            |          |            |            |             | 609           | 957         | 923          | 321        | -251         | -464956     | -178826     | 120413      | -1853698    | 4240753      | 3957840      | 4572590587   | 1838629534   | 65788560      |              |
| C10 |        |       |            |          |            |            |             |               | 171         | 121          | 18686      | -1013014     | -1457533    | -1651331    | -1697447    | -2181706    | 263321141    | -1832242767  | 4666724      | 4659530      | 4683766       |              |
| C11 |        |       |            |          |            |            |             |               |             | 37           | 125656     | 77712        | -9280919    | 2744856     | 1407015     | 712503      | 169849113    | 417676100    | 111409241    | 11685594405  | 4345881532    |              |
| C12 |        |       |            |          |            |            |             |               |             |              | -15498     | -1721653     | -914946     | -669782     | -916101     | -1826217    | -1417392783  | 161008597    | 1648437265   | 94953344     | -52585153388  |              |
| C13 |        |       |            |          |            |            |             |               |             |              |            | -28528       | -912975     | 324952      | -342246     | -398278     | 269528428    | 193612415    | -9560885980  | -10310761924 | 3245980094    |              |
| C14 |        |       |            |          |            |            |             |               |             |              |            |              | 25703       | 18413       | -73332      | 8451        | -9225425952  | -8481461857  | -22862958444 | -26292408673 | -37560577898  |              |
| C15 |        |       |            |          |            |            |             |               |             |              |            |              |             | 145         | 39278       | 5           | -15465987444 | -43820410748 | -23901924457 | -43820205609 | -30931904966  |              |
| C16 |        |       |            |          |            |            |             |               |             |              |            |              |             |             |             | 6           | 28582        | -43820613692 | 18132714489  | -37560437804 | -262923129260 | -52584617562 |
| C17 |        |       |            |          |            |            |             |               |             |              |            |              |             |             |             |             | 136          | -29213734775 | 58427620203  | -40449691608 | -262923060086 | -87641006212 |
| C18 |        |       |            |          |            |            |             |               |             |              |            |              |             |             |             |             |              | -15024102613 | -43820412279 | -30931903319 | -87640414281  | -65730300349 |
| H19 |        |       |            |          |            |            |             |               |             |              |            |              |             |             |             |             |              |              | 4541         | 6826         | 1923          |              |
| H20 |        |       |            |          |            |            |             |               |             |              |            |              |             |             |             |             |              |              | -154         | 8873         | -10471        |              |
| H21 |        |       |            |          |            |            |             |               |             |              |            |              |             |             |             |             |              |              |              |              | -4            |              |
| H22 |        |       |            |          |            |            |             |               |             |              |            |              |             |             |             |             |              |              |              | -11          | -7            |              |
| H23 |        |       |            |          |            |            |             |               |             |              |            |              |             |             |             |             |              |              |              |              |               |              |
| H24 |        |       |            |          |            |            |             |               |             |              |            |              |             |             |             |             |              |              |              |              |               |              |
| H25 |        |       |            |          |            |            |             |               |             |              |            |              |             |             |             |             |              |              |              |              |               |              |
| H26 |        |       |            |          |            |            |             |               |             |              |            |              |             |             |             |             |              |              |              |              |               |              |
| H27 |        |       |            |          |            |            |             |               |             |              |            |              |             |             |             |             |              |              |              |              |               |              |
| H28 |        |       |            |          |            |            |             |               |             |              |            |              |             |             |             |             |              |              |              |              |               |              |
| H29 |        |       |            |          |            |            |             |               |             |              |            |              |             |             |             |             |              |              |              |              |               |              |
| H30 |        |       |            |          |            |            |             |               |             |              |            |              |             |             |             |             |              |              |              |              |               |              |
| H31 |        |       |            |          |            |            |             |               |             |              |            |              |             |             |             |             |              |              |              |              |               |              |
| H32 |        |       |            |          |            |            |             |               |             |              |            |              |             |             |             |             |              |              |              |              |               |              |
| H33 |        |       |            |          |            |            |             |               |             |              |            |              |             |             |             |             |              |              |              |              |               |              |
| H34 |        |       |            |          |            |            |             |               |             |              |            |              |             |             |             |             |              |              |              |              |               |              |
| H35 |        |       |            |          |            |            |             |               |             |              |            |              |             |             |             |             |              |              |              |              |               |              |
| H36 |        |       |            |          |            |            |             |               |             |              |            |              |             |             |             |             |              |              |              |              |               |              |
| H37 |        |       |            |          |            |            |             |               |             |              |            |              |             |             |             |             |              |              |              |              |               |              |
| H38 |        |       |            |          |            |            |             |               |             |              |            |              |             |             |             |             |              |              |              |              |               |              |
| H39 |        |       |            |          |            |            |             |               |             |              |            |              |             |             |             |             |              |              |              |              |               |              |
| H40 |        |       |            |          |            |            |             |               |             |              |            |              |             |             |             |             |              |              |              |              |               |              |
| H41 |        |       |            |          |            |            |             |               |             |              |            |              |             |             |             |             |              |              |              |              |               |              |
| H42 |        |       |            |          |            |            |             |               |             |              |            |              |             |             |             |             |              |              |              |              |               |              |
| H43 |        |       |            |          |            |            |             |               |             |              |            |              |             |             |             |             |              |              |              |              |               |              |
| H44 |        |       |            |          |            |            |             |               |             |              |            |              |             |             |             |             |              |              |              |              |               |              |



cont. **Table S10:** For molecule 4: ratio analysis,  $\Delta\omega_0/J \geq 10$  (Data from **Table S6**).

|     | H24           | H25          | H26          | H27          | H28          | H29          | H30          | H31          | H32          | H33          | H34           | H35          | H36          | H37           | H38          | H39          | H40          | H41           | H42           | H43          | H44          |
|-----|---------------|--------------|--------------|--------------|--------------|--------------|--------------|--------------|--------------|--------------|---------------|--------------|--------------|---------------|--------------|--------------|--------------|---------------|---------------|--------------|--------------|
| Hg  |               |              |              |              |              |              |              |              |              |              |               |              |              |               |              |              |              |               |               |              |              |
| Se2 |               |              |              |              |              |              | 78466102     | 16368674     | 315827923    |              |               |              |              |               |              |              |              |               |               |              |              |
| Se3 |               |              |              |              |              |              |              |              |              | -475090385   | 759632534     | -134454685   | 19872339     | 3228442409    | -887823070   | 6313389972   | -5516570912  | -1759150209   | -19593284698  | 372839533    | 304178836    |
| P4  |               |              |              |              |              |              |              |              |              | -21282795    | -174290481    | -58169650    | 924904       | 62231879      | 25628538     | 1007104902   | -1314308934  | 257834025     | 6965811554    | 38691991     | -1397824421  |
| S15 | 105823736     | 125951283    | 119026897    | 124392595    | 124145702    | 121940307    | 1425006936   | -370558086   | 1863838171   |              |               |              |              |               |              |              |              |               |               |              |              |
| F6  |               |              |              |              |              |              | 200534316    | 118263807    | 135218214    | -85068331    | -94772557     | -173685112   | 141689525    | 33557889      | 50501228     | 62894458     | -33667517    | 65166032      | 17296042      | 85593182     | 170128317    |
| F7  |               |              |              |              |              |              | 30742834     | -51582183    | -80374943    | -3290347     | -290013001    | -264154273   | 44598398     | -217133967    | -129200898   | 609879723    | 638054271    | 57600335      | 17417883      | 73535767     | 73533313     |
| C9  | 1421210671    | 76754894     | -4108200714  | 99179175     | -14606891886 | 1613030532   | 507087015    | 109052100    | 315447284    | -8912745356  | -8346809693   | -11431508097 | -6044294959  | -21033989567  | -13838174732 | 75121281817  | 20225026121  | 47804490257   | -525849131488 | -20225050926 | -23902270004 |
| C10 | 5908439485    | 2528129543   | 81150132     | 2103404608   | 92173755     | 8912730832   | -15934921206 | 1314630982   | 105170757596 | -21910630906 | -19476006533  | -19476019933 | -10731771982 | -29214050272  | -18780493055 | -52585213844 | -40450295760 | -105170511711 | -58428033024  | -35056965987 | -40450238910 |
| C11 | 4692339       | 4770623      | 4381272      | -5421151421  | 1999436537   | 100737865    | -22863171109 | -16962997693 | -13483444197 | 12825748231  | 525852712101  | 40450236454  | -9921837035  | -105170688125 | -26292717063 | 52585267416  | 22863233939  | 14607030397   | 29214046274   | 7512214650   | 20225140059  |
| C12 | 91755631      | -5258513491  | 2401156445   | 4685857      | 4638899      | 4641231      | -5975600046  | -3370851263  | 75122027463  | 65731943252  | -175284193548 | -65731617806 | -9738096877  | -17528443639  | -10731718568 | -20225097796 | -12825713394 | -29214053490  | -30932511852  | -35056992938 | -40450270007 |
| C13 | -10731607343  | 10955178968  | -3895188909  | -2266589645  | 22862996489  | -4206790118  | 3948713      | 4102690      | 3638254      | -4869007291  | -7106078676   | -8216409122  | -7303534344  | -65731318816  | 87641908528  | 105169956814 | 27676394237  | -21910425174  | 5155392       | -5778594895  | -10310799048 |
| C14 | -525848075116 | 29213772545  | 10516996362  | 525848113052 | 65731029324  | -35056538669 | -7512133725  | -6829212386  | -5778579659  | 3941358      | 4266178       | 4350826      | 93634934     | -5535261746   | -2209457002  | 895824701    | -9225452734  | -52584951951  | -87641543029  | 4737400457   | 1276335114   |
| C15 | 175280789653  | -75120314236 | -40449547072 | -18780085961 | -11950966555 | -13483137792 | -21910152274 | -23901983980 | 525845042782 | -2528107676  | 591499923     | -3148765227  | -1102406880  | 4059005       | 4063247      | 287503222    | -138453159   | 65249263      | 1019076651    | 1664068812   | 182584847    |
| C16 | 26292308008   | 175281996952 | 87641317190  | -23902099914 | -15024180561 | -16432692659 | -43820620483 | -32865464923 | 21033953360  | -21910424490 | 3349345366    | 6656298534   | 2030316112   | -320638994    | -288769276   | 4337957      | 4060452      | -384672717    | -177651129    | 65731191977  | 112025597    |
| C17 | 20224846993   | 47804168410  | 27676198147  | -37560432840 | -25040294347 | -21033841069 | -21033892298 | -15934766679 | -75121242234 | 6260119636   | -32865442753  | 6573093073   | 937347121    | 1387461247    | 67895250     | -425098663   | -185812280   | 4209844       | 4487478       | -212980720   | -327019909   |
| C18 | 18132496115   | 22862705132  | 7512059004   | -52584242527 | -37560181915 | -20224707394 | -10955076520 | -8764061099  | -12825489297 | 2492163104   | 812741035     | 2054077388   | 217832684    | -3130024870   | 118620591    | 64942993     | 737510685    | 216842817     | -153575809    | 3816727      | 4074639      |
| H19 | -10751        | 1062         | -1784        | -3481        | 16849        | 8949         | 129          | -120         | 5763         | -12276       | -669          | -1293        | -30059       | -5986         | -11017       | -7194        | -76330       | -8285         | -398          | -14193       | -7159        |
| H20 | 5954          | 10378        | 2837         | 2057         | -7040        | -13103       | 4939         | -4229        | 158          | -6409        | -6089         | -6969        | -9853        | -23311        | -3754        | 17255        | 759          | 10142         | 44418         | -54376       | -13532       |
| H21 | -111          | -612         | 693          | -6885        | -966         | 267          | 69291        | -8134        | -65969       | -45601       | -11882        | -19144       | -33787       | -27601        | -28065       | -27056       | -51141       | -38824        | -31947        | -46665       | -36117       |
| H22 | 660           | 12746        | -6230        | -253         | 26           | -289         | 169610       | -9442        | 88809        | -56946       | -10710        | -21732       | -34028       | -44537        | -43217       | -925932      | 219364       | 67302         | -216941       | -297936      | -82318       |
| H23 | 351           | 1192         | -7961        | 229          | -449         | 245          | -14943       | 7944         | -34082       | -102875      | -16615        | -31302       | -37732       | -34140        | -31115       | -34787       | -71455       | -285788       | -61453        | -186677      | -79048       |
| H24 |               | -15          | -142         | -131         | -810         | 2            | -10452       | -5919        | 243075       | 50345        | -24141        | 129457       | -27076       | 447686        | -96121       | 16521        | 18833        | 9441          | 15987         | 14936        | 23159        |
| H25 |               |              | -152         | 1312         | 2910         | -530         | -9635        | -9783        | -19210       | 37472        | 153941        | 48283        | -34602       | -78402        | -39732       | 170514       | 93550        | 19679         | 38639         | 23019        | 34301        |
| H26 |               |              |              | 11923        | 5027         | -7623        | -1822        | -1191        | -4585        | 7346         | 13893         | 3938         | -14078       | -1165         | -6974        | 42276        | 16463        | 1878          | 7999          | 5216         | 1898         |
| H27 |               |              |              |              | -10          | -3           | -6465        | -4699        | -23747       | 107829       | -256072       | -99006       | -33580       | -21118        | -18556       | -14295       | -24705       | -40185        | -27930        | -185428      | -75143       |
| H28 |               |              |              |              |              | -14          | -3190        | -2770        | -6349        | 38681        | 27356         | -632275      | -23835       | -13155        | -11509       | -8159        | -24244       | -160809       | -55521        |              |              |
| H29 |               |              |              |              |              |              | -9148        | -4717        | -11120       | -125709      | -22985        | -23652       | -27709       | -15804        | -14925       | -10509       | -17473       | -18221        | -16139        | -33374       | -27216       |
| H30 |               |              |              |              |              |              |              | -1           | -208         | -9110        | -993          | -699         | -15373       | -7653         | -36045       | -15373       | -72255       | -1936         | -1425         | -8294        | -4676        |
| H31 |               |              |              |              |              |              |              |              | -149         | -8381        | -957          | -643         | -14781       | -8129         | 87           | 613          | -41489       | -1348         | -1027         | -6279        | -3793        |
| H32 |               |              |              |              |              |              |              |              |              | -3376        | -5182         | -5019        | -9772        | 294359        | 138          | 17930        | 274          | -307356       | -82820        | -2900        | -4873        |
| H33 |               |              |              |              |              |              |              |              |              |              | -230          | -236         | 150          | 10076         | -8049        | -115512      | -117897      | 16884         | 26835         | 1590         | 3930         |
| H34 |               |              |              |              |              |              |              |              |              |              |               | -33          | 3869         | -4700         | -4177        | 99           | -9534        | -7211         | -3452         | 9803         | 2671         |
| H35 |               |              |              |              |              |              |              |              |              |              |               |              | 8476         | 5093          | -13341       | 4491         | -50258       | 287           | 3394          | 4725         | 6307         |
| H36 |               |              |              |              |              |              |              |              |              |              |               |              |              | 4164          | 3522         | -130241      | -21610       | 12555         | -377492       | -4257        | 22830        |
| H37 |               |              |              |              |              |              |              |              |              |              |               |              |              |               | -115         | 143          | 80           | -862          | -4639         | 6026         | -785         |
| H38 |               |              |              |              |              |              |              |              |              |              |               |              |              |               |              | 4364         | 5            | 1420          | -4627         | -2444        | 5107         |
| H39 |               |              |              |              |              |              |              |              |              |              |               |              |              |               |              |              | -151         | 909           | 26            | -4789        | 2071         |
| H40 |               |              |              |              |              |              |              |              |              |              |               |              |              |               |              |              |              | 188           | 116           | 4707         | -2407        |
| H41 |               |              |              |              |              |              |              |              |              |              |               |              |              |               |              |              |              |               | -26           | 262          | 1071         |
| H42 |               |              |              |              |              |              |              |              |              |              |               |              |              |               |              |              |              |               |               | 197          | 88           |
| H43 |               |              |              |              |              |              |              |              |              |              |               |              |              |               |              |              |              |               |               |              | -173         |
| H44 |               |              |              |              |              |              |              |              |              |              |               |              |              |               |              |              |              |               |               |              |              |
